# Supplementary material
Source: PubMed Central journal article supplement (PMC3150404)
Supplement: NIHMS312884-supplement-1_si_001.pdf [file NIHMS312884-supplement-1_si_001.pdf]

## Supporting Information for:

# A More Reactive Trigonal Bipyramidal High-Spin Oxoiron(IV) Complex with a *cis*-Labile Site.

Jason England, Yisong Guo, Katherine M. Van Heuvelen, Matthew A. Cranswick, Gregory T. Rohde, Emile L. Bominaar,\* Eckard Münck,\* and Lawrence Que, Jr.\*

### Contents:

|                                |                                                                                                                                   |        |
|--------------------------------|-----------------------------------------------------------------------------------------------------------------------------------|--------|
|                                | Materials and instrumentation                                                                                                     | S2     |
|                                | Synthetic procedures                                                                                                              | S3-4   |
| Table S1 & S2 and Figure S1    | X-ray crystallography                                                                                                             | S4-7   |
| Figure S2                      | Mössbauer spectrum from reaction of <b>4</b> with 1 equiv of 2-( <sup>t</sup> BuSO <sub>2</sub> )C <sub>6</sub> H <sub>4</sub> IO | S8     |
| Figure S3                      | Resonance Raman spectra of <b>7</b> , <b>7-N<sub>3</sub></b> , and <b>7-Cl</b>                                                    | S9     |
| Figure S4 – S7                 | Mössbauer spectra of <b>7</b> , <b>7-N<sub>3</sub></b> , and <b>7-Cl</b>                                                          | S10-14 |
| Figure S8 – S10                | EPR spectra of <b>7</b> , <b>7-N<sub>3</sub></b> , and <b>7-Cl</b>                                                                | S15-17 |
| Tables S3 – S5 and Figure S11  | XAS studies                                                                                                                       | S18-21 |
| Tables S6 – S13 and Figure S12 | DFT studies                                                                                                                       | S22-29 |
| Figures S13 – S15              | Substrate oxidation kinetics                                                                                                      | S30-31 |
| References                     |                                                                                                                                   | S32    |

## Materials and Instrumentation.

All reagents were purchased from vendors and used as received, unless noted otherwise. Diethyl ether and tetrahydrofuran were dried by prolonged reflux, under a nitrogen atmosphere, over sodium metal with a benzophenone ketyl indicator and distilled freshly prior to use. Acetonitrile and dichloromethane were treated in a similar manner, but using calcium hydride as the drying agent. The reagents 2-(*tert*-butylsulfonyl)iodosylbenzene (2-(<sup>t</sup>BuSO<sub>2</sub>)C<sub>6</sub>H<sub>4</sub>IO),<sup>1</sup> Fe(OTf)<sub>2</sub>(CH<sub>3</sub>CN)<sub>2</sub><sup>2</sup> and chlorotetramethylformamidine chloride ([Me<sub>2</sub>N]<sub>2</sub>CCl]Cl)<sup>3</sup> were all prepared according to published procedures.

All moisture and oxygen sensitive compounds were prepared using a standard high vacuum line and Schlenk techniques. A nitrogen-filled glove box was used for any subsequent manipulation and storage of these compounds. <sup>1</sup>H, <sup>13</sup>C and <sup>19</sup>F (+150 to -200 ppm) NMR spectra were recorded on a Varian Inova 500 MHz spectrometer at ambient temperature. Chemical shifts (ppm) were referenced to the residual protic solvent peaks. Elemental analyses for **2** were performed by Atlantic Microlab (Norcross, GA). UV-Visible studies were performed using a HP8453A diode array spectrometer equipped with a cryostat from Unisoku Scientific Instruments (Osaka, Japan). Electrospray ionization mass spectrometry experiments were carried out on a Bruker BioTOF II mass spectrometer using a spray chamber voltage of 4000 V and a gas carrier temperature of 60°C.

Mössbauer spectra were recorded with two spectrometers, using Janis Research Super-Varitemp dewars that allowed studies in applied magnetic fields up to 8.0 T in temperature range from 1.5 to 200 K. Mössbauer spectral simulations were performed using the WMOSS software package (SEE Co, Edina, MN). Isomer shifts are quoted relative to Fe metal at 298 K.

Parallel-mode X band (9.28 GHz) EPR spectra were recorded on a Bruker ESR 300 spectrometer equipped with an Oxford ESR 910 liquid Helium cryostat and an Oxford temperature controller. The microwave frequency was calibrated with a frequency counter and the magnetic field with a NMR gaussmeter. EPR spectral simulations were carried out using a Windows software package (SpinCount) available from Professor Michael Hendrich of Carnegie Mellon University. The simulations are least-squares fits of the experimental spectra.

## Synthetic Procedures.

TMG<sub>2</sub>dien [2',2'-(2,2'-(methylazanediyl)bis(ethane-1,2-diyl))bis(1,1,3,3-tetramethylguanidine)]: this ligand was synthesized according to the general procedure outlined in reference 4, using 5.00 g (29.2 mmol) of [(Me<sub>2</sub>N)<sub>2</sub>CCl]Cl and 1.71 g (14.6 mmol) of *N*<sup>2</sup>-methyl-diethylenetriamine. The product was obtained as a yellow oil (4.1 g, 90 %). <sup>1</sup>H-NMR (CDCl<sub>3</sub>, 500 MHz): δ 3.27 (m, 4 H, CH<sub>2</sub>), 2.73 (s, 12 H, NMe<sub>2</sub>), 2.62 (s, 12 H, NMe<sub>2</sub>), 2.58 (m, 4 H, CH<sub>2</sub>), 2.33 (s, 3 H, NCH<sub>3</sub>). <sup>13</sup>C-NMR (CDCl<sub>3</sub>, 125 MHz): δ 160.4 (N=C), 61.1 (NCH<sub>3</sub>), 48.4 (CH<sub>2</sub>), 43.7 (CH<sub>2</sub>), 39.6 (NMe<sub>2</sub>), 38.8 (NMe<sub>2</sub>). MS (+ESI): *m/z* 314.3 [(M+H)<sup>+</sup>].

[Fe<sup>II</sup>(TMG<sub>2</sub>dien)(Cl)<sub>2</sub>] (**5**): A mixture of TMG<sub>2</sub>dien (0.30 g, 0.96 mmol) and iron(II) dichloride (0.12 g, 0.96 mmol) was stirred in tetrahydrofuran (10 mL) for 12 hours, during which time a precipitate formed. This solid was isolated by filtration, washed with tetrahydrofuran (5 mL) and diethyl ether (15 mL), and dried under vacuum to give the product as a white powder (0.40 g, 95 %). Crystals suitable for X-ray analysis were obtained by vapor diffusion of diethyl ether into a concentrated dichloromethane solution of the complex. <sup>1</sup>H-NMR (CD<sub>3</sub>CN, all peaks appear as broad singlets): δ 80.6 (3 H, NCH<sub>3</sub>), 23.1 (24 H, NMe<sub>2</sub>). MS (+ESI): *m/z* 404.2 [(M-Cl)<sup>+</sup>]. Anal. Calcd. (found) for C<sub>15</sub>H<sub>35</sub>Cl<sub>2</sub>FeN<sub>7</sub>: C, 40.92 (40.83); H, 8.01 (8.03); N, 22.27 (22.32).

[Fe<sup>II</sup>(TMG<sub>2</sub>dien)(OTf)<sub>2</sub>] (**4**): A mixture of **5** (0.20 g, 0.45 mmol) and thallium(I) triflate (0.32 g, 0.91 mmol) was stirred in dichloromethane (10 mL) for 18 hours. The resultant mixture was filtered to remove thallium(I) salts and the filtrate was reduced to dryness, thereby yielding the product as an off-white to cream colored solid (0.29 g, 96 %). Crystals suitable for X-ray analysis were obtained by vapor diffusion of diethyl ether into a concentrated dichloromethane solution of the complex. <sup>1</sup>H-NMR (CD<sub>3</sub>CN, all peaks appear as broad singlets): δ 178.1 (1 H, CH<sub>2</sub>), 159.9 (1 H, CH<sub>2</sub>), 156.0 (1 H, CH<sub>2</sub>), 116.1 (3 H, NMe), 97.7 (1 H, CH<sub>2</sub>), 66.6 (1 H, CH<sub>2</sub>), 57.5 (1 H, CH<sub>2</sub>), 38.4 (6 H, NMe<sub>2</sub>), 35.4 (3 H, NMe<sub>2</sub>), 33.3 (3 H, NMe<sub>2</sub>), 30.7 (3 H, NMe<sub>2</sub>), 21.5 (7 H, 2 NMe<sub>2</sub> + CH<sub>2</sub>), 14.6 (1 H, CH<sub>2</sub>), -36.5 (3 H, NMe<sub>2</sub>). <sup>19</sup>F-NMR (CD<sub>3</sub>CN, all peaks appear as broad singlets): δ -77.9. <sup>19</sup>F-NMR (CD<sub>2</sub>Cl<sub>2</sub>, all peaks appear as broad singlets): δ -35. MS (+ESI): *m/z* 518.2 [(M-OTf)<sup>+</sup>], 184.6 [{M-(OTf)<sub>2</sub>}<sup>2+</sup>]. Anal. Calcd. (found) for C<sub>17</sub>H<sub>35</sub>F<sub>6</sub>FeN<sub>7</sub>O<sub>6</sub>S<sub>2</sub>·2H<sub>2</sub>O: C, 29.02 (29.23); H, 5.59 (5.57); N, 13.94 (13.87).

[Fe<sup>IV</sup>(O)(TMG<sub>2</sub>dien)(CH<sub>3</sub>CN)]<sup>2+</sup> (**7**): Solutions of the orange-brown complex **7** were prepared by reaction of acetonitrile solutions of **4** with three equivalents of 2-(<sup>t</sup>BuSO<sub>2</sub>)C<sub>6</sub>H<sub>4</sub>IO,

dissolved in dichloromethane. Solutions of oxidant up to a concentration of 80 mM were routinely used.

$[\text{Fe}^{\text{IV}}(\text{O})(\text{TMG}_2\text{dien})(\text{X})]^+$  (**7-X**, X = N<sub>3</sub>, Cl): Solutions of the anion substituted complexes **7-N<sub>3</sub>** and **7-Cl** were prepared from **7** by the addition of  $\geq 2$  equivalents of acetonitrile solutions of tetrabutylammonium azide and tetrabutylammonium/ tetraheptylammonium chloride, respectively.

### **X-Ray Crystallography.**

Selected single crystals of **4** and **5** were placed onto the top of 0.1 mm diameter glass capillaries and mounted on a Bruker SMART V5.054 CCD area detector diffractometer for data collection at temperatures of 173(2) and 123(2) K, respectively. A preliminary set of cell constants was collected from reflections harvested from three sets of 20 frames. These initial sets of frames were oriented such that orthogonal wedges of reciprocal space were surveyed and then used to produce initial orientation matrices. Data collection was carried out using MoK $\alpha$  radiation (graphite monochromator), with a detector distance of 4.8 cm and frame times of 30 and 15 seconds for **4** and **5**, respectively. A randomly oriented region of reciprocal space was surveyed to the extent of one sphere and to a resolution of 0.77 Å, with four major sections of frames being collected using 0.30° steps in  $\omega$  at four different  $\phi$  settings and a detector position of -28° in  $2\theta$ . The intensity data were corrected for absorption and decay (SADABS).<sup>5</sup> Final cell constants were calculated from the actual data collection after integration (SAINT).<sup>6</sup> Please refer to Tables S1 and S2, plus accompanying text, for additional crystal and refinement information.

The structures were solved and refined using Bruker SHELXTL.<sup>7</sup> Space groups were determined based on systematic absences and intensity statistics. In both cases a direct-methods solution was calculated, which provided most non-hydrogen atoms from the E-map. The remaining non-hydrogen atoms were located by full-matrix least squares/ difference Fourier cycles. All non-hydrogen atoms were refined with anisotropic displacement parameters. All hydrogen atoms were placed in ideal positions and refined as riding atoms with relative isotropic displacement parameters.

**Table S1.** Crystal data and structure refinement for [Fe<sup>II</sup>(TMG<sub>2</sub>dien)(OTf)<sub>2</sub>] (**4**).

---

|                                        |                                                                                                |                            |
|----------------------------------------|------------------------------------------------------------------------------------------------|----------------------------|
| Identification code                    | 09197a                                                                                         |                            |
| Empirical formula                      | C <sub>17</sub> H <sub>35</sub> F <sub>6</sub> Fe N <sub>7</sub> O <sub>6</sub> S <sub>2</sub> |                            |
| Formula weight                         | 667.49                                                                                         |                            |
| Temperature                            | 173(2) K                                                                                       |                            |
| Wavelength                             | 0.71073 Å                                                                                      |                            |
| Crystal system                         | Monoclinic                                                                                     |                            |
| Space group                            | P2 <sub>1</sub> /c                                                                             |                            |
| Unit cell dimensions                   | $a = 18.512(3)$ Å                                                                              | $\alpha = 90^\circ$        |
|                                        | $b = 9.1559(14)$ Å                                                                             | $\beta = 106.291(2)^\circ$ |
|                                        | $c = 17.378(3)$ Å                                                                              | $\gamma = 90^\circ$        |
| Volume                                 | 2827.2(7) Å <sup>3</sup>                                                                       |                            |
| Z                                      | 4                                                                                              |                            |
| Density (calculated)                   | 1.568 Mg/m <sup>3</sup>                                                                        |                            |
| Absorption coefficient                 | 0.766 mm <sup>-1</sup>                                                                         |                            |
| $F(000)$                               | 1384                                                                                           |                            |
| Crystal color, morphology              | Colorless, Needle                                                                              |                            |
| Crystal size                           | 0.50 x 0.22 x 0.20 mm <sup>3</sup>                                                             |                            |
| Theta range for data collection        | 2.29 to 27.53°                                                                                 |                            |
| Index ranges                           | -23 ≤ $h$ ≤ 23, 0 ≤ $k$ ≤ 11, 0 ≤ $l$ ≤ 22                                                     |                            |
| Reflections collected                  | 26830                                                                                          |                            |
| Independent reflections                | 6456 [ $R(\text{int}) = 0.0405$ ]                                                              |                            |
| Observed reflections                   | 5063                                                                                           |                            |
| Completeness to $\theta = 27.53^\circ$ | 99.1%                                                                                          |                            |
| Absorption correction                  | Multi-scan                                                                                     |                            |
| Max. and min. transmission             | 0.858 and 0.817                                                                                |                            |
| Refinement method                      | Full-matrix least-squares on $F^2$                                                             |                            |
| Data / restraints / parameters         | 6456 / 0 / 361                                                                                 |                            |
| Goodness-of-fit on $F^2$               | 1.014                                                                                          |                            |
| Final $R$ indices [ $I > 2\sigma(I)$ ] | $R1 = 0.0379$ , $wR2 = 0.0732$                                                                 |                            |
| $R$ indices (all data)                 | $R1 = 0.0581$ , $wR2 = 0.0798$                                                                 |                            |
| Largest diff. peak and hole            | 0.334 and -0.426 e.Å <sup>-3</sup>                                                             |                            |

**Table S2.** Crystal data and structure refinement for [Fe<sup>II</sup>(TMG<sub>2</sub>dien)(Cl)<sub>2</sub>] (**5**).

|                                        |                                                                   |                            |
|----------------------------------------|-------------------------------------------------------------------|----------------------------|
| Identification code                    | 10016a                                                            |                            |
| Empirical formula                      | C <sub>15</sub> H <sub>35</sub> Cl <sub>2</sub> Fe N <sub>7</sub> |                            |
| Formula weight                         | 440.25                                                            |                            |
| Temperature                            | 123(2) K                                                          |                            |
| Wavelength                             | 0.71073 Å                                                         |                            |
| Crystal system                         | Triclinic                                                         |                            |
| Space group                            | P-1                                                               |                            |
| Unit cell dimensions                   | $a = 9.0439(11)$ Å                                                | $\alpha = 68.485(2)^\circ$ |
|                                        | $b = 10.4536(13)$ Å                                               | $\beta = 84.128(2)^\circ$  |
|                                        | $c = 12.3764(16)$ Å                                               | $\gamma = 77.745(2)^\circ$ |
| Volume                                 | 1063.4(2) Å <sup>3</sup>                                          |                            |
| Z                                      | 2                                                                 |                            |
| Density (calculated)                   | 1.375 Mg/m <sup>3</sup>                                           |                            |
| Absorption coefficient                 | 0.974 mm <sup>-1</sup>                                            |                            |
| $F(000)$                               | 468                                                               |                            |
| Crystal color, morphology              | Colorless, Block                                                  |                            |
| Crystal size                           | 0.40 x 0.32 x 0.26 mm <sup>3</sup>                                |                            |
| Theta range for data collection        | 1.77 to 27.54°                                                    |                            |
| Index ranges                           | $-11 \leq h \leq 11, -12 \leq k \leq 13, 0 \leq l \leq 16$        |                            |
| Reflections collected                  | 12761                                                             |                            |
| Independent reflections                | 4808 [ $R(\text{int}) = 0.0262$ ]                                 |                            |
| Observed reflections                   | 4224                                                              |                            |
| Completeness to theta = 27.54°         | 98.3%                                                             |                            |
| Absorption correction                  | Multi-scan                                                        |                            |
| Max. and min. transmission             | 0.91 and 0.84                                                     |                            |
| Refinement method                      | Full-matrix least-squares on $F^2$                                |                            |
| Data / restraints / parameters         | 4808 / 0 / 235                                                    |                            |
| Goodness-of-fit on $F^2$               | 1.041                                                             |                            |
| Final $R$ indices [ $I > 2\sigma(I)$ ] | $R1 = 0.0259, wR2 = 0.0651$                                       |                            |
| $R$ indices (all data)                 | $R1 = 0.0318, wR2 = 0.0683$                                       |                            |
| Largest diff. peak and hole            | 0.344 and -0.215 e.Å <sup>-3</sup>                                |                            |

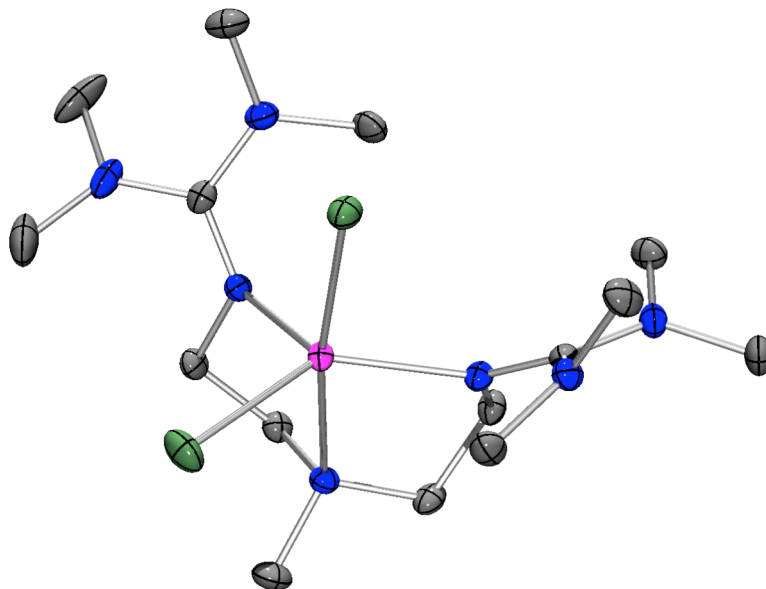

**Figure S1.** Thermal ellipsoid drawing of  $[\text{Fe}^{\text{II}}(\text{TMG}_2\text{dien})(\text{Cl})_2]$  (**5**), showing 50% probability ellipsoids. Hydrogen atoms have been omitted for clarity. Selected bond distances ( $\text{\AA}$ ):  $\text{Fe}-\text{Cl}_{\text{axial}}$ , 2.4370(5);  $\text{Fe}-\text{Cl}_{\text{equatorial}}$ , 2.3487(5);  $\text{Fe}-\text{N}_{\text{axial}}$ , 2.4187(12);  $\text{Fe}-\text{N}_{\text{guanidine(ave)}}$ , 2.1096(12). Atom color scheme: C, gray; Cl, green; Fe, magenta; N, blue.

Reaction of  $[\text{Fe}^{\text{II}}(\text{TMG}_2\text{dien})(\text{OTf})_2]$  (4) with Equimolar 2-( $^t\text{BuSO}_2$ ) $\text{C}_6\text{H}_4\text{IO}$ .

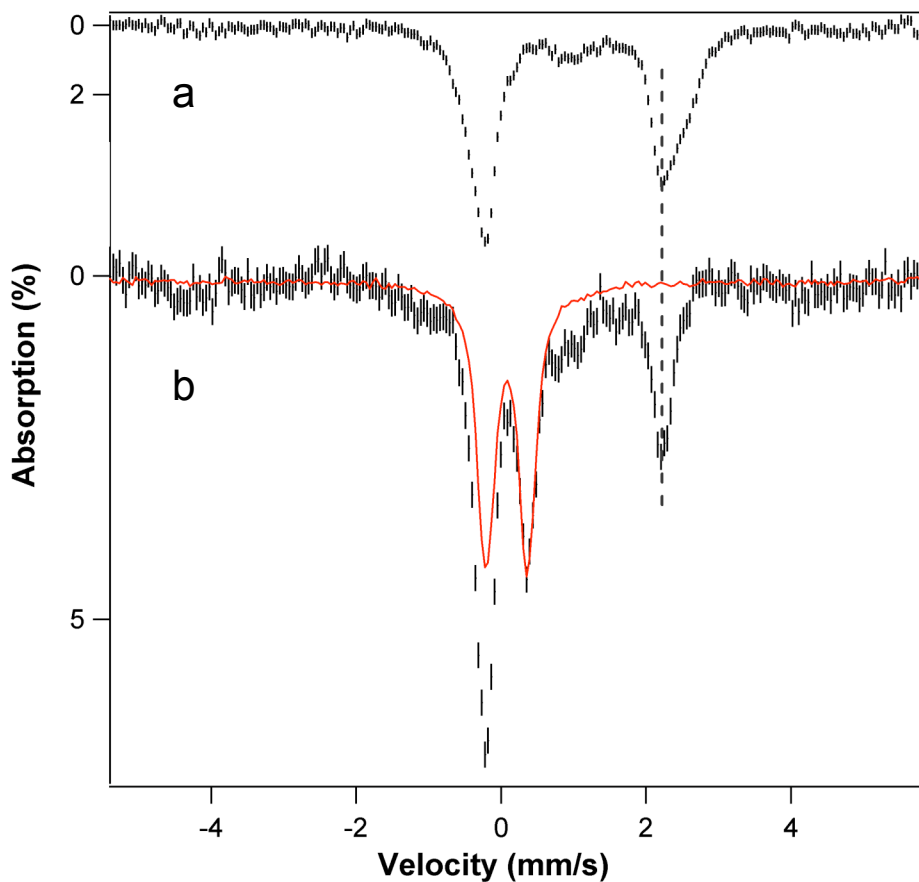

**Figure S2.** 4.2 K 0.45 kG Mössbauer spectra of (a)  $[\text{Fe}^{\text{II}}(\text{TMG}_2\text{dien})(\text{OTf})_2]$  in  $\text{CH}_3\text{CN}$ , (b) the reaction product of  $[\text{Fe}^{\text{II}}(\text{TMG}_2\text{dien})(\text{OTf})_2]$  with 1 equiv (black) and 3 equiv (red) of 2-( $^t\text{BuSO}_2$ ) $\text{C}_6\text{H}_4\text{IO}$  in  $\text{CH}_3\text{CN}$ . The intensity of the red curve was scaled to match the features of the spectrum in black hatched marks.



## Resonance Raman Spectroscopy

Resonance Raman spectra were collected using a Spectra-Physics Model 2030-15 argon ion laser and an ACTON AM-506 monochromator equipped with a Princeton LN/CCD data collection system. Low temperature spectra in CH<sub>3</sub>CN, CD<sub>3</sub>CN, or 3:1 CH<sub>3</sub>CN/CH<sub>2</sub>Cl<sub>2</sub> were obtained at 77 K using a 135° backscattering geometry. Samples were frozen onto a gold-plated copper cold finger in thermal contact with a Dewar flask containing liquid nitrogen. Raman frequencies were calibrated to indene prior to data collection. The monochromator slit width was set for a band-pass of 4 cm<sup>-1</sup> for all spectra. All spectra were collected with a laser excitation wavelength and power of 514.5 nm and 10 mW. Due to the photosensitivity of the samples the plotted spectra are the average of 3-5 spectra, which in turn are an average of 8 scans with collection times of 30 s. All spectra were intensity corrected to the 751 cm<sup>-1</sup> solvent peak of CH<sub>2</sub>Cl<sub>2</sub>.

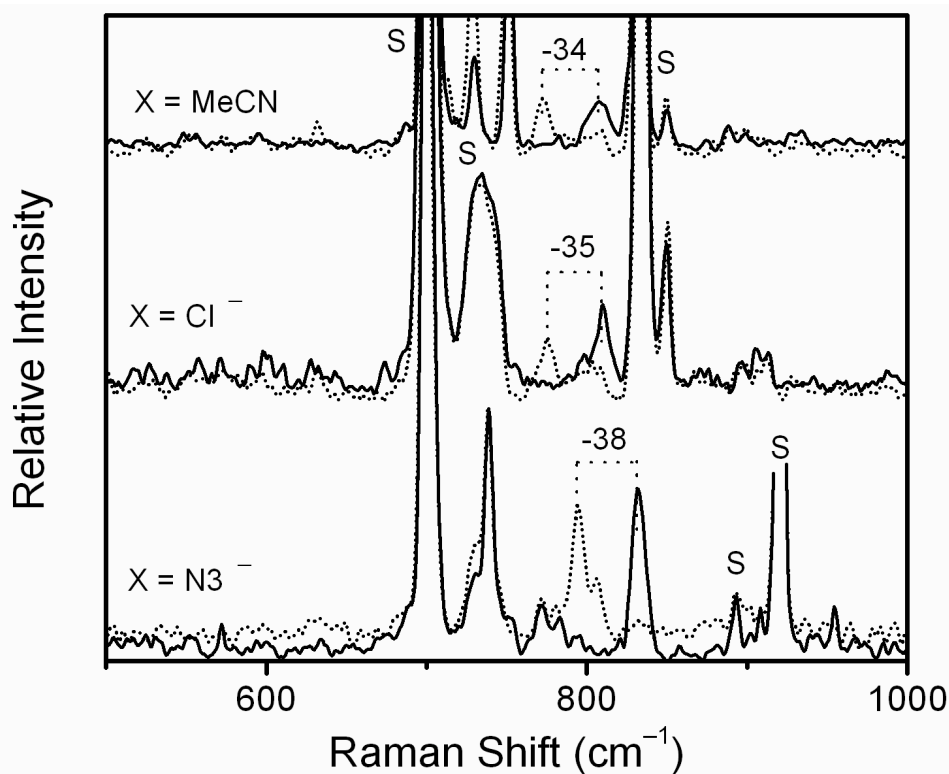

**Figure S3.** Resonance Raman spectra of  $[\text{Fe}^{\text{IV}}(\text{O})(\text{TMGdien})(\text{X})]^{2+/1+}$  where  $\text{X} = \text{MeCN}$ ,  $\text{Cl}^-$ , and  $\text{N}_3^-$  (<sup>16</sup>O – solid line; <sup>18</sup>O – dotted line) recorded with an excitation wavelength and power of 514.5 nm and 10 mW. Major solvent peaks are marked with an “S”.

### Comment on the Mössbauer parameters listed in Table 1.

The spectra were analyzed with the  $S = 2$  spin Hamiltonian

$$\mathcal{H}_e = D \left[ \hat{S}_z^2 - 2 + (E/D) (\hat{S}_x^2 - \hat{S}_y^2) \right] + 2\beta \hat{\mathbf{S}} \cdot \mathbf{B} + \hat{\mathbf{S}} \cdot \vec{\mathbf{A}} \cdot \hat{\mathbf{I}} - g_n \beta_n \mathbf{B} \cdot \hat{\mathbf{I}} + \mathcal{H}_Q$$
$$\mathcal{H}_Q = (eQV_{zz'} / 12) \left[ 3I_z^2 - 15/14 + \eta (I_x^2 - I_y^2) \right]$$

$(x', y', z')$  is the principal axis system of the EFG tensor; in WMOSS the Euler angles  $[\alpha, \beta, \gamma]_{\text{EFG}}$  rotate  $(x', y', z')$  into the frame  $(x, y, z)$  of the zero-field splitting (ZFS) tensor.  $\eta = (V_{x'x'} - V_{y'y'}) / V_{z'z'}$  is the asymmetry parameter.

For our analysis we were confined to spectra recorded at 4.2 K. Above 10 K the applied field spectra were unresolved due to intermediate relaxation of the electronic spin system. The listed (ZFS) parameters are quite good.  $E/D$  was obtained by EPR and the magnitude of  $D$  (ca.  $\pm 0.5 \text{ cm}^{-1}$ ) follows from the field dependence of the magnetic hyperfine interactions. For **7** and **7-N<sub>3</sub>** the uncertainties the  $x$  and  $y$  of the components of the  $^{57}\text{Fe}$  magnetic hyperfine tensor are about  $\pm 0.8 \text{ T}$ . The electric field gradient (EFG) tensors of **7** and **7-N<sub>3</sub>** we found to be rotated relative to the frame of the zero-field splitting tensor. As  $\Delta E_Q$  is quite small, DFT calculations are not a reliable source of information about the EFG. Despite the fact that  $\Delta E_Q$  is small, the analysis of the Mössbauer spectra indicates that the EFG tensors of **7** and **7-N<sub>3</sub>** are rotated relative to the frame of the ZFS tensor as the EFG affects quite sensitively the positions of the absorption lines. Thus, because the electronic system is nearly axial and  $D > 0$ , the expectation values of the electronic spin are large in the  $xy$  plane and small along  $z$ . Consequently, the magnetic hyperfine field is large in the  $xy$  plane. Hence the Mössbauer spectra are mainly probing the components of the EFG in the  $xy$  plane. If the EFG is not rotated in the simulations the positions of the two inner lines of the magnetic spectra are not properly positioned relative to the outer lines.  $\beta_{\text{EFG}}$  is probably correct within  $10^\circ$ . For **7** and **7-N<sub>3</sub>** the asymmetry parameter  $\eta$  is quite soft and difficult to determine with precision from the available data.

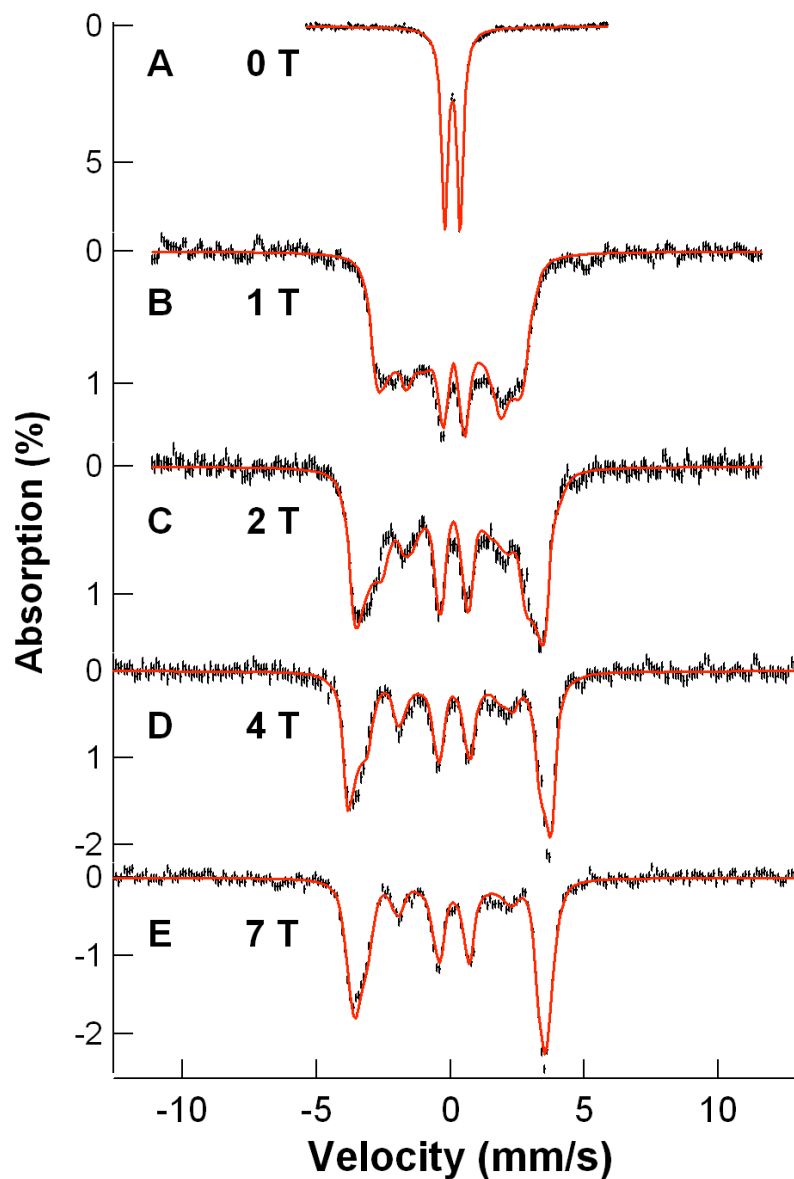

**Figure S4.** 4.2 K Mössbauer spectra of **7** in CH<sub>3</sub>CN recorded in parallel applied magnetic fields as indicated. In all spectra, a high-spin Fe<sup>III</sup> impurity, representing ~ 12% of the iron, has been subtracted from the raw data except for **A**. Solid lines are spectral simulations using the parameters listed in Table 1 in the main text.

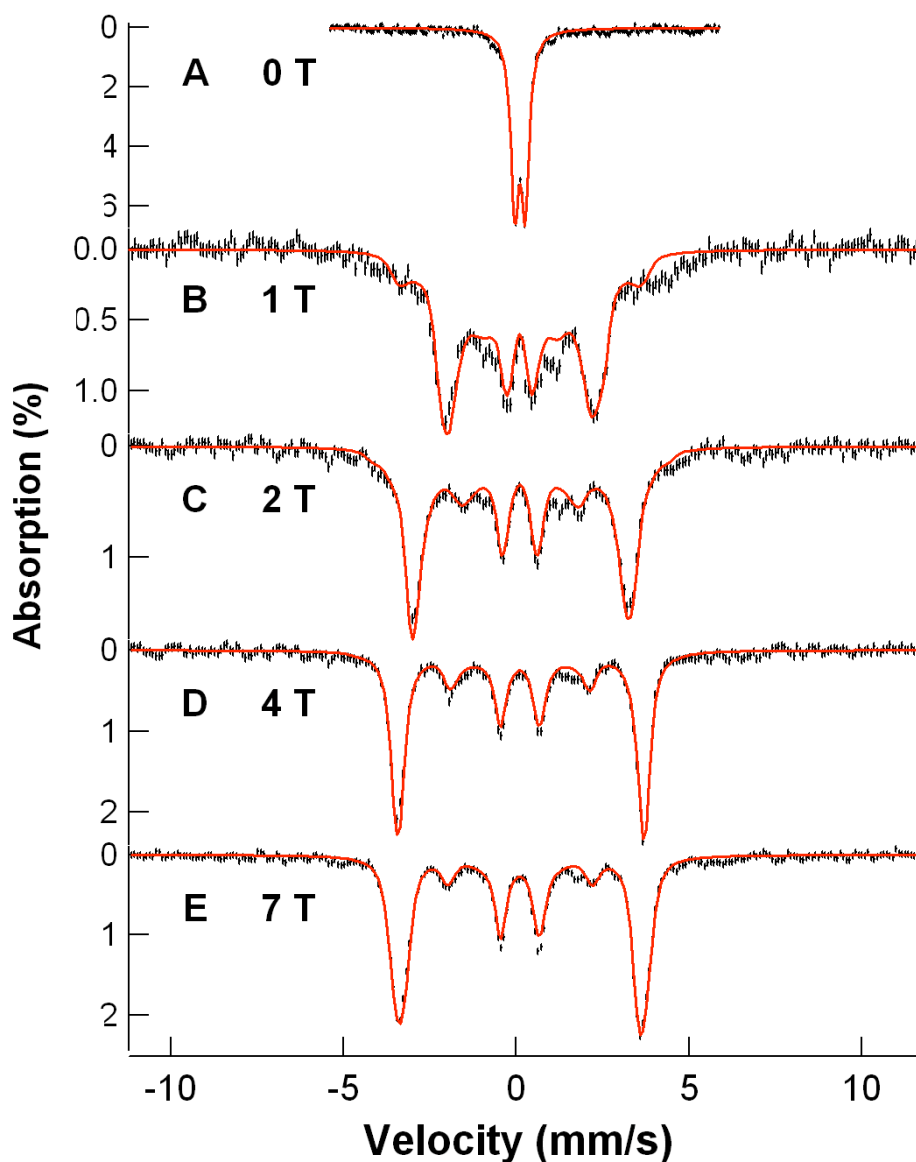

**Figure S5.** 4.2 K Mössbauer spectra of 7-N<sub>3</sub> in CH<sub>3</sub>CN recorded in parallel applied magnetic fields as indicated. In all spectra, a high-spin Fe<sup>III</sup> impurity, representing ~ 15% of the iron, has been subtracted from the raw data except for **A**. Solid lines are spectral simulations using the parameters listed in Table 1 in the main text.

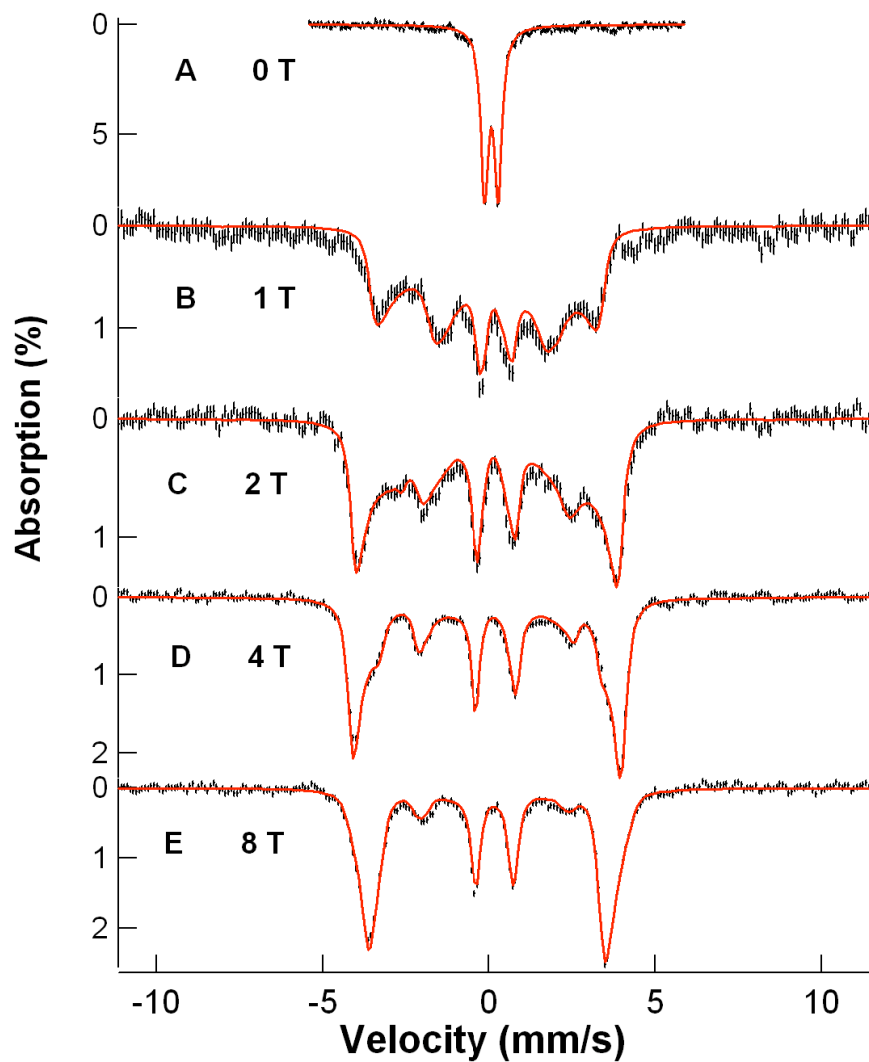

**Figure S6.** 4.2 K Mössbauer spectra of 7-Cl in CH<sub>3</sub>CN recorded in parallel applied magnetic fields as indicated. In all spectra, a high-spin Fe<sup>III</sup> impurity, representing ~ 13% of the iron, has been subtracted from the raw data except for **A** and **B**. Solid lines are spectral simulations using the parameters listed in Table 1 in the main text.

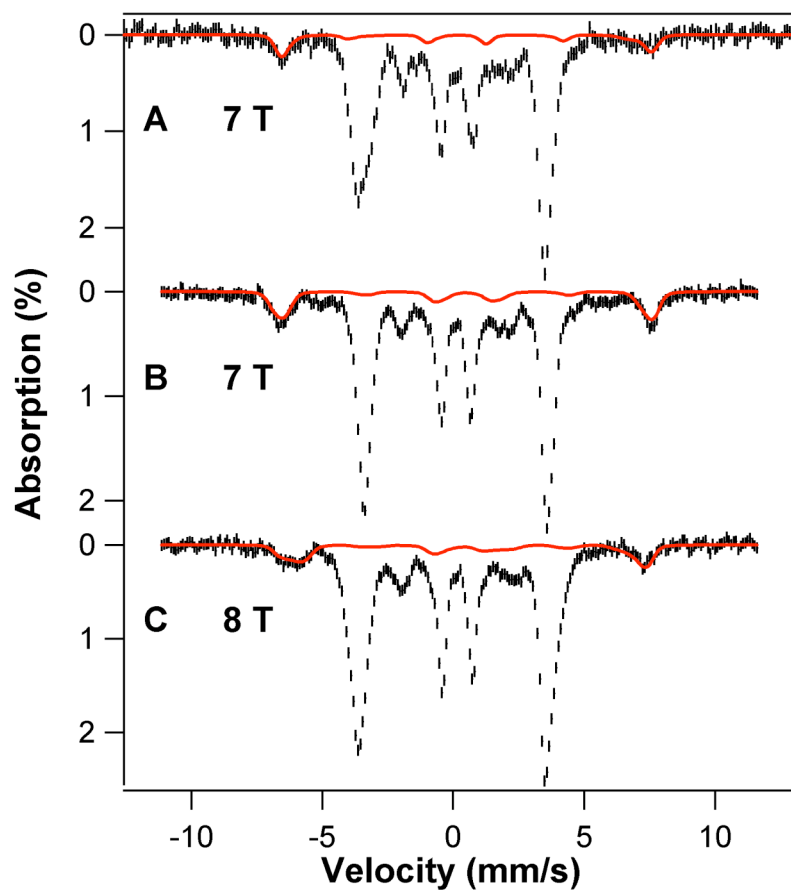

**Figure S7.** 4.2 K Mössbauer spectra of (A) **7**, (B) **7-N<sub>3</sub>**, and (C) **7-Cl** in CH<sub>3</sub>CN recorded in parallel applied magnetic fields as indicated (black). The red lines are spectral simulations indicating the high-spin Fe<sup>III</sup> impurity in the samples (~12% for **7**, ~15% for **7-N<sub>3</sub>**, and ~13% for **7-Cl**).

### Additional EPR Spectra.

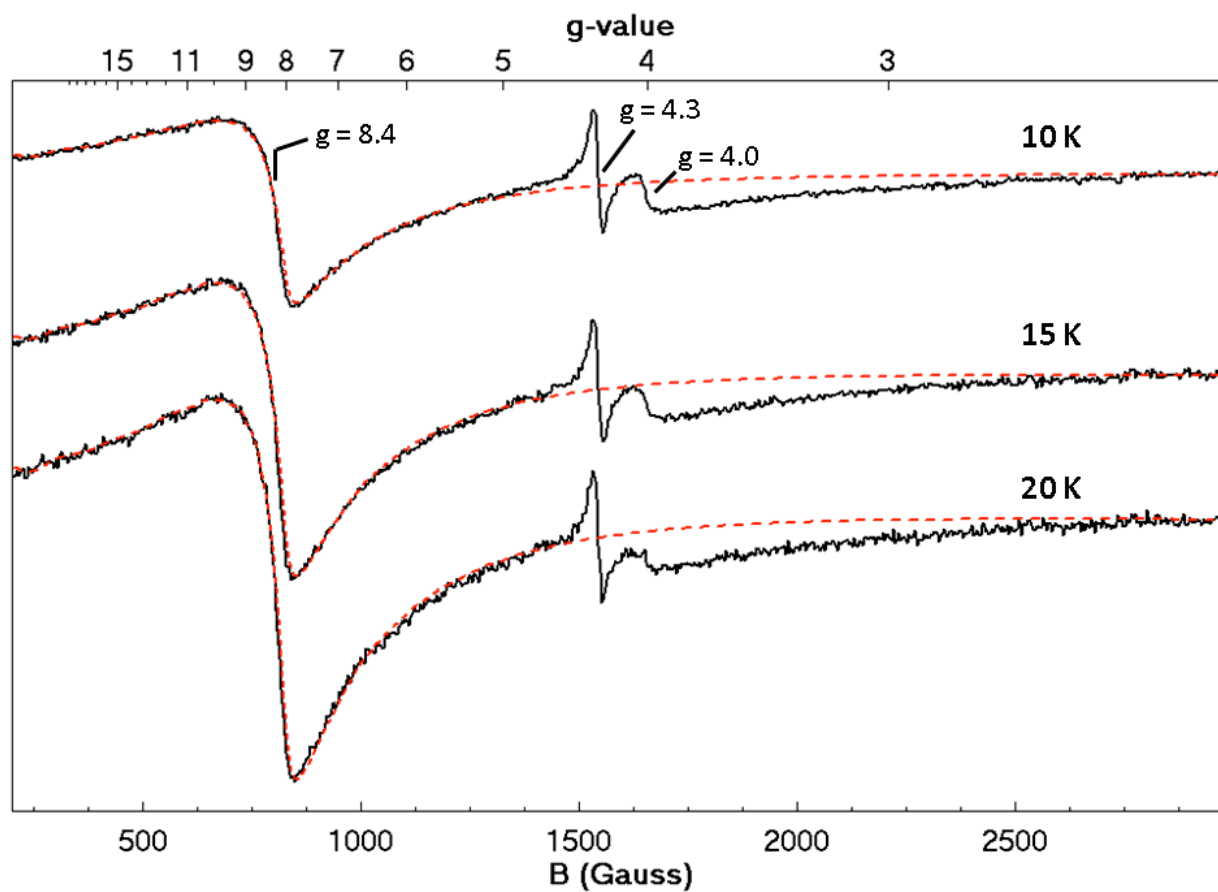

**Figure S8.** X band EPR spectra of **7** in  $\text{CH}_3\text{CN}$  (black) recorded at different temperatures as indicated. Red lines are SpinCount simulations for  $D = 4.2 \text{ cm}^{-1}$ ,  $E/D = 0.10$ , and  $\sigma(E/D) = 0.03$ . Experimental conditions:  $B_1 \parallel B$ , microwave power, 2 mW at 9.28 GHz. The signal at  $g = 4.3$  is from the iron impurity, the signal at  $g = 4$  is from trapped  $\text{O}_2$  in the sample.

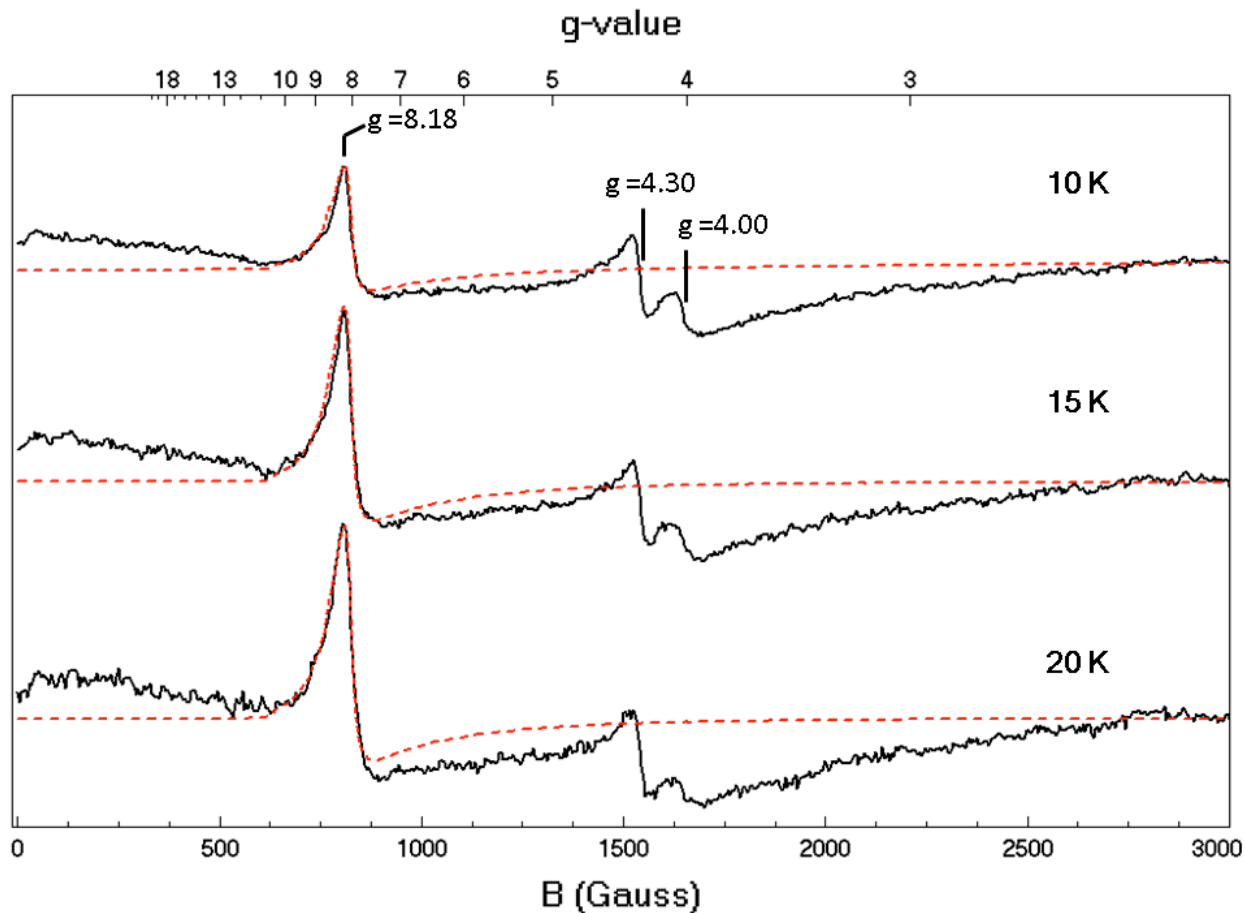

**Figure S9.** X band EPR spectra of 7-N<sub>3</sub> in CH<sub>3</sub>CN (black) recorded at different temperatures as indicated. Red lines are SpinCount simulations for  $D = 5.0 \text{ cm}^{-1}$ ,  $E/D = 0.05$ , and  $\sigma(E/D) = 0.02$ . Experimental conditions:  $B_1 \parallel B$ , microwave power, 20 mW at 9.28 GHz. The signal at  $g = 4.3$  is from the iron impurity, the signal at  $g = 4$  is from trapped O<sub>2</sub> in the sample.



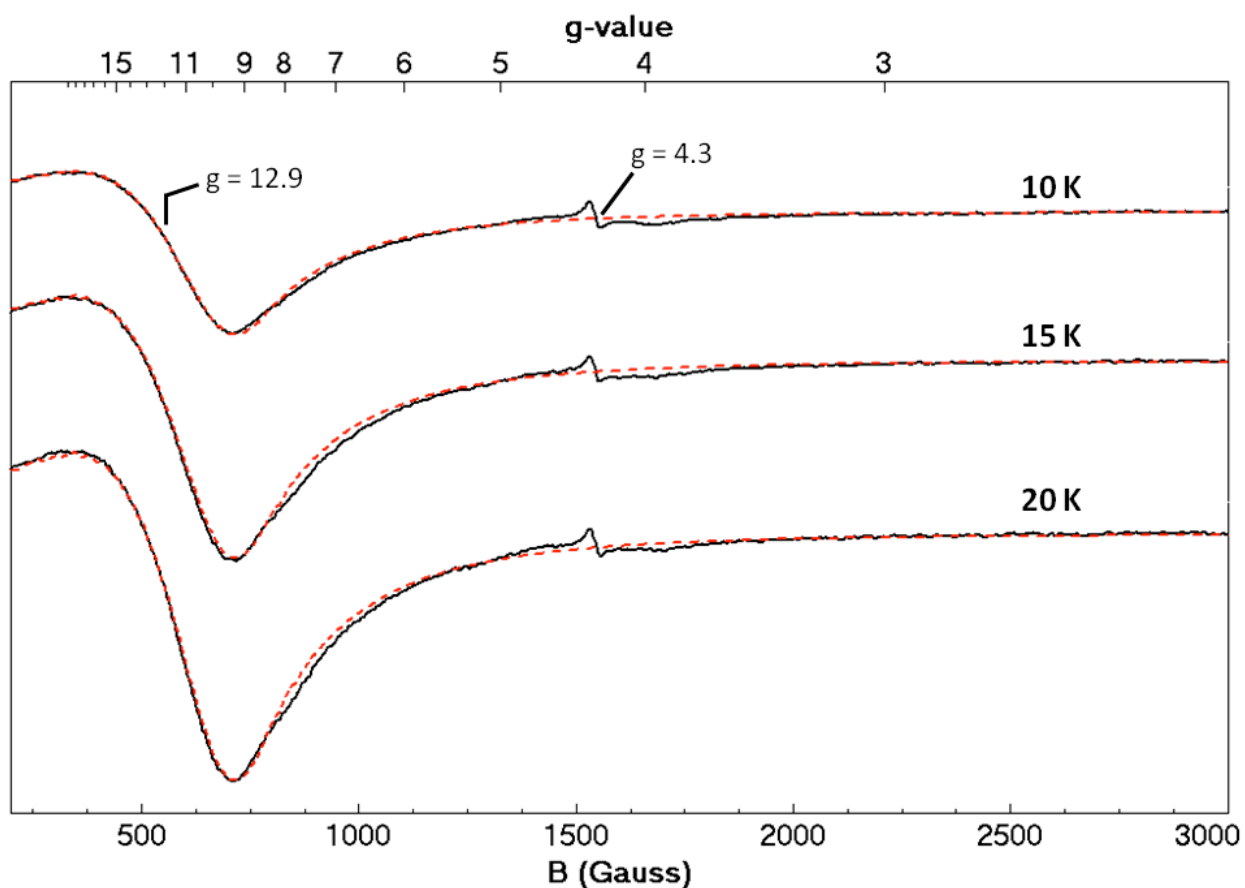

**Figure S10.** X band EPR spectra of 7-Cl in CH<sub>3</sub>CN (black) recorded at different temperatures as indicated. Red lines are SpinCount simulations for  $D = 4.2 \text{ cm}^{-1}$ ,  $E/D = 0.14$ , and  $\sigma(E/D) = 0.016$ . Experimental conditions:  $B_1 \parallel B$ , microwave power, 2 mW at 9.28 GHz. The signal at  $g = 4.3$  is from the iron impurity.

## XAS Studies.

X-ray absorption spectroscopic (XAS) data for **4**, **7**, **7-N<sub>3</sub>**, and **7-Cl** were collected at the Stanford Synchrotron Radiation Lightsource (SSRL) of SLAC National Laboratory on the unfocussed beamline 7-3. Fe K-edge XAS data were collected over a range of 6.88 – 7.99 keV for frozen samples prepared in tandem Mössbauer/XAS cups in a mixture of acetonitrile/15% dichloromethane V/V (**4**, 5.1 mM; **7**, 5.0 mM, 82% Fe<sup>IV</sup>; **7-N<sub>3</sub>**, 5.1 mM, 85% Fe<sup>IV</sup>; **7-Cl**, 5.0 mM, 78% Fe<sup>IV</sup>). A Rh-coated harmonic rejection mirror was positioned upstream of the Si(220) double crystal monochromator. An Oxford Instruments CF1208 continuous flow liquid helium cryostat maintained a temperature of ~ 10 K in the sample compartment. Fluorescence data were collected with a 30 element solid-state germanium detector array (Canberra). An iron foil, run concurrently with the sample, was used for internal energy calibration, and the first inflection point of the Fe K-edge spectrum was taken to be 7112.0 eV.

Careful monitoring of the edge energy and the intensity of the pre-edge feature indicated that samples of **7** and **7-Cl** were somewhat susceptible to photoreduction. Such effects were minimized by realigning the sample to expose a new spot after collecting ca. 8-9 scans. In the case of **7-N<sub>3</sub>** the rapidity of photoreduction prevented collection of sufficient data for EXAFS analysis.

The software package EXAFSPAK<sup>8</sup> was employed for data reduction, averaging, and normalization.<sup>9</sup> The amplitude reduction factor  $S_0$  was set to 0.9 and the coordination number  $N$  was fixed and varied iteratively. The remaining parameters,  $r$ ,  $\sigma^2$ , and the edge shift parameter  $E_0$ , were allowed to freely float. Note that  $E_0$  was linked for all shells, resulting in a single value. DFT energy-minimized structures were employed in conjunction with the software package FEFF 8.40<sup>10</sup> to calculate phase and amplitude parameters, which were fit in EXAFSPAK via the “opt” program. The quality of the fit was ascertained using the goodness-of-fit parameters  $F$ , defined as  $F = \sum(\chi_{\text{exptl}} - \chi_{\text{calc}})^2$ , and the  $F$ -factor, defined as  $F = [\sum k^6(\chi_{\text{exptl}} - \chi_{\text{calc}})^2 / \sum k^6 \chi_{\text{exptl}}^2]^{1/2}$ . All pre-edge analyses were performed with the software package SSEXAFS<sup>11</sup> using previously reported methodology.<sup>12</sup>

The inclusion of four shells best reproduced the raw EXAFS data collected for **7** (Fit 33, Table S4). Examination of the Debye-Waller and  $F$ -factors associated with fits 1-7 indicate that a five-coordinate model best reproduces the raw EXAFS data. The bond length of 1.65 Å associated with the Fe–O/N scatterer is consistent with Fe(IV)–O<sub>oxo</sub> bond distances previously

observed for other Fe(IV) species. Iterative fits of the Fe–O/N coordination number yielded a best fit of 0.8, corresponding with the relative amount of Fe(IV) in the sample. A second shell of Fe–N/O scatterers was introduced to model the nitrogen atoms deriving from TMG<sub>2</sub>dien and NCCH<sub>3</sub>. As DFT geometry optimization studies suggest that the axial Fe–N<sub>axial</sub> bond elongates slightly (~ 2.15 Å) relative to Fe–N<sub>TMG<sub>2</sub>dien</sub> bonds in the equatorial plane, a third Fe–N/O shell was introduced to the fit. However, this either led to unreasonable values of  $\sigma^2$  or resulted in excessively short (~ 1.8 Å) or long (~ 3.5 Å) optimized Fe–N/O bond lengths. Therefore, a single shell was used to model the N/O scatters at ~ 1.94 Å from the iron center, which presumably correspond to the supporting ligand and the bound acetonitrile. The inclusion of two shells of carbon scatterers, presumably associated with the TMG<sub>2</sub>dien ligand, accurately reproduced the features observed at R ~ 2.4 and 2.9 Å in the Fourier-transformed data.

Similar to the fit obtained for **7**, the structural parameters of **7-Cl** are best fit with an Fe–O scatterer at 1.66 Å corresponding to the oxo moiety and three additional Fe–N/O at 1.94 Å attributed to the TMG<sub>2</sub>dien ligand (Fit 19, Table S5). As for **7**, EXAFS cannot resolve the slight elongation of the axial Fe–N<sub>TMG<sub>2</sub>dien</sub> bond predicted by DFT. The spectroscopic perturbations upon substitution of chloride that were observed by UV-visible and Mössbauer spectroscopies are also reflected in the EXAFS data. A fifth chloride scatterer at 2.27 Å replaces the fourth N/O scatterer associated with **7**. The coordination numbers associated with both the O/N scatterer at 1.65 Å and the Cl scatterer were varied in units of 0.1, and *N* values of 0.8, roughly corresponding to the percentage of Fe(IV) in the sample, for both of these scatterers yielded chemically reasonable bond lengths,  $\sigma^2$  parameters, and goodness-of-fit values.

**Table S3.** Pre-edge analysis parameters for **4**, **7**, **7-Cl**, and **7-N<sub>3</sub>**.

| Species                | E <sub>edge</sub> (eV) | E <sub>pre-edge</sub> (eV) | Height   | Width    | Area    |
|------------------------|------------------------|----------------------------|----------|----------|---------|
| <b>4</b>               | 7121.87                | 7112.66(9)                 | 0.063(1) | 2.09(4)  | 13.9(3) |
|                        |                        | 7114.57(7)                 | 0.021(2) | 0.70     | 1.6(1)  |
| <b>7</b>               | 7123.556               | 7113.27(5)                 | 0.105(1) | 1.785(2) | 19.9(3) |
|                        |                        | 7115.04(1)                 | 0.022(2) | 1.31     | 3.1(2)  |
| <b>7-Cl</b>            | 7123.915               | 7113.928                   | 0.109(2) | 1.89(4)  | 21.9(6) |
|                        |                        | 7115.695                   | 0.024(3) | 0.81     | 2.1(2)  |
| <b>7-N<sub>3</sub></b> | 7124.155               | 7113.803                   | 0.120(2) | 1.94(4)  | 24.7(6) |
|                        |                        | 7115.659                   | 0.043(2) | 1.99     | 9.2(4)  |
|                        |                        | 7118.051                   | 0.035(2) | 1.48     | 5.5(4)  |

**Table S4.** EXAFS fitting results for  $[\text{Fe(IV)(O)(TMG2dien)(MeCN)}]^{2+}$  (7).

| Fit       | Fe–O/N     |               |                           |          | Fe–N/O        |              |            | Fe•••C        |              | Fe•••C     |               |              | F            | F-Factor     |            |
|-----------|------------|---------------|---------------------------|----------|---------------|--------------|------------|---------------|--------------|------------|---------------|--------------|--------------|--------------|------------|
|           | <i>N</i>   | <i>r</i> (Å)  | $\sigma^2$ <sup>(a)</sup> |          | <i>N</i>      | <i>r</i> (Å) | $\sigma^2$ | <i>N</i>      | <i>r</i> (Å) | $\sigma^2$ | <i>N</i>      | <i>r</i> (Å) |              |              | $\sigma^2$ |
| 1         |            |               |                           | 4        | 1.9520        | 3.99         |            |               |              |            |               |              | 649.3        | 0.768        |            |
| 2         |            |               |                           | 5        | 1.9500        | 5.68         |            |               |              |            |               |              | 721.2        | 0.809        |            |
| 3         |            |               |                           | 6        | 1.9568        | 7.93         |            |               |              |            |               |              | 796.2        | 0.850        |            |
| 4         | 1          | 1.6444        | 8.50                      | 2        | 1.9391        | 0.35         |            |               |              |            |               |              | 548.6        | 0.705        |            |
| 5         | 1          | 1.6475        | 5.42                      | 3        | 1.9436        | 2.38         |            |               |              |            |               |              | 512.1        | 0.682        |            |
| 6         | 1          | 1.6504        | 3.95                      | 4        | 1.9455        | 4.17         |            |               |              |            |               |              | 507.3        | 0.679        |            |
| 7         | 1          | 1.6512        | 2.97                      | 5        | 1.9459        | 5.92         |            |               |              |            |               |              | 521.8        | 0.688        |            |
| 8         | 1          | 1.6439        | 4.40                      | 2        | 1.9495        | 1.46         |            |               |              |            |               |              | 503.9        | 0.676        |            |
|           |            |               |                           | 2        | 1.9349        | 11.43        |            |               |              |            |               |              |              |              |            |
| 9         | 1          | 1.6584        | 5.29                      | 3        | 1.9443        | 2.00         |            |               |              |            |               |              | 503.1        | 0.676        |            |
|           |            |               |                           | 1        | 2.0630        | 3.85         |            |               |              |            |               |              |              |              |            |
| 10        | 1          | 1.6567        | 5.01                      | 2        | 1.9434        | 1.45         |            |               |              |            |               |              | 503.4        | 0.676        |            |
|           |            |               |                           | 2        | 1.9933        | 8.34         |            |               |              |            |               |              |              |              |            |
| 11        | 1          | 1.5740        | 12.52                     | 1        | 1.8727        | -1.60        |            |               |              |            |               |              | 570.8        | 0.720        |            |
|           |            |               |                           | 3        | 2.1970        | 3.33         |            |               |              |            |               |              |              |              |            |
| 12        | 1          | 1.6379        | 4.33                      | 2        | 1.9568        | 1.27         | 2          | 2.8591        | -1.90        |            |               |              | 380.0        | 0.587        |            |
|           |            |               |                           | 2        | 1.9194        | 13.02        |            |               |              |            |               |              |              |              |            |
| 13        | 1          | 1.6360        | 4.26                      | 2        | 1.9557        | 1.20         | 3          | 2.8578        | -0.20        |            |               |              | 401.7        | 0.604        |            |
|           |            |               |                           | 2        | 1.9088        | 13.11        |            |               |              |            |               |              |              |              |            |
| 14        | 1          | 1.6573        | 5.43                      | 3        | 1.9478        | 2.34         | 3          | 2.8610        | -0.10        |            |               |              | 404.0        | 0.606        |            |
|           |            |               |                           | 1        | 2.0599        | 7.69         |            |               |              |            |               |              |              |              |            |
| 15        | 1          | 1.6574        | 5.11                      | 3        | 1.9456        | 2.51         | 4          | 2.8608        | 1.35         |            |               |              | 427.3        | 0.623        |            |
|           |            |               |                           | 1        | 2.0419        | 8.42         |            |               |              |            |               |              |              |              |            |
| 16        | 1          | 1.6566        | 4.79                      | 3        | 1.9451        | 2.60         | 5          | 2.8616        | 2.83         |            |               |              | 450.4        | 0.639        |            |
|           |            |               |                           | 1        | 2.0307        | 9.17         |            |               |              |            |               |              |              |              |            |
| 17        | 1          | 1.6393        | 2.35                      | 3        | 1.9570        | 2.90         | 4          | 2.8495        | 4.92         | 1          | 3.3513        | -5.70        | 269.9        | 0.495        |            |
|           |            |               |                           | 1        | 1.8493        | 3.45         |            |               |              |            |               |              |              |              |            |
| 18        | 1          | 1.6521        | 4.64                      | 3        | 1.9607        | 2.82         | 4          | 2.9198        | 2.02         | 2          | 3.0989        | -3.30        | 290.2        | 0.513        |            |
|           |            |               |                           | 1        | 2.0813        | 7.68         |            |               |              |            |               |              |              |              |            |
| 19        | 1          | 1.6522        | 4.57                      | 3        | 1.9637        | 2.70         | 4          | 2.9179        | 1.06         | 3          | 3.0954        | -2.00        | 294.7        | 0.517        |            |
|           |            |               |                           | 1        | 2.0973        | 6.74         |            |               |              |            |               |              |              |              |            |
| 20        | 1          | 1.6453        | 2.92                      | 3        | 1.9103        | 3.39         | 4          | 2.8481        | 3.88         | 4          | 3.3582        | -1.20        | 230.1        | 0.457        |            |
|           |            |               |                           | 1        | 1.9964        | 0.34         |            |               |              |            |               |              |              |              |            |
| 21        | 1          | 1.6335        | 3.29                      | 3        | 1.9496        | 2.73         | 4          | 2.8466        | 3.47         | 5          | 3.3551        | -0.30        | 226.0        | 0.453        |            |
|           |            |               |                           | 1        | 1.8366        | 6.90         |            |               |              |            |               |              |              |              |            |
| 22        | 1          | 1.6482        | 3.72                      | 4        | 1.9410        | 4.37         | 3          | 2.8483        | 1.61         | 6          | 3.3590        | 0.51         | 213.4        | 0.440        |            |
| 23        | 1          | 1.6481        | 3.60                      | 4        | 1.9408        | 4.42         | 4          | 2.8492        | 3.50         | 6          | 3.3589        | 0.36         | 227.6        | 0.455        |            |
| 24        | 1          | 1.6312        | 3.18                      | 2        | 1.9564        | 1.38         | 3          | 2.8465        | 1.18         | 7          | 3.3579        | 1.31         | 213.2        | 0.440        |            |
|           |            |               |                           | 2        | 1.8768        | 8.37         |            |               |              |            |               |              |              |              |            |
| 25        | 1          | 1.6392        | 7.38                      | 2        | 1.9375        | 0.61         | 3          | 2.8223        | 2.27         | 6          | 3.3531        | 0.64         | 237.7        | 0.465        |            |
|           |            |               |                           | 2        | 2.5354        | 10.76        |            |               |              |            |               |              |              |              |            |
| 26        | 1          | 1.6442        | 4.84                      | 3        | 1.9457        | 2.76         | 3          | 2.8501        | 2.33         | 6          | 3.3690        | -1.20        | 199.2        | 0.425        |            |
|           |            |               |                           | 1        | 3.4995        | -4.60        |            |               |              |            |               |              |              |              |            |
| 27        | 1          | 1.6482        | 3.76                      | 4        | 1.9399        | 4.33         | 3          | 2.8459        | 1.62         | 6          | 3.3597        | 0.50         | 214.0        | 0.441        |            |
| 28        | 1          | 1.6488        | 3.86                      | 4        | 1.9416        | 4.31         | 3          | 2.8490        | 1.27         | 8          | 3.3610        | 1.86         | 219.2        | 0.446        |            |
| 29        | 0.9        | 1.6474        | 3.14                      | 4        | 1.9419        | 4.48         | 3          | 2.8490        | 1.64         | 6          | 3.3596        | 0.50         | 215.3        | 0.442        |            |
| 30        | 0.8        | 1.6468        | 2.53                      | 4        | 1.9430        | 4.59         | 3          | 2.8498        | 1.66         | 6          | 3.3602        | 0.49         | 218.1        | 0.445        |            |
| 31        | 0.8        | 1.6469        | 2.41                      | 4        | 1.9428        | 4.65         | 4          | 2.8509        | 3.59         | 6          | 3.3601        | 0.33         | 232.2        | 0.459        |            |
| 32        | 0.8        | 1.6470        | 2.62                      | 4        | 1.9432        | 4.55         | 3          | 2.8501        | 1.47         | 7          | 3.3611        | 1.18         | 220.4        | 0.447        |            |
| <b>33</b> | <b>0.8</b> | <b>1.6471</b> | <b>2.48</b>               | <b>4</b> | <b>1.9431</b> | <b>4.61</b>  | <b>4</b>   | <b>2.8508</b> | <b>3.35</b>  | <b>7</b>   | <b>3.3610</b> | <b>1.02</b>  | <b>235.7</b> | <b>0.463</b> |            |

<sup>a</sup>Fourier-transform range is 2 – 14 Å<sup>-1</sup> (resolution = 0.13 Å), and  $\sigma^2$  is in units of 10<sup>3</sup> Å<sup>2</sup>.

**Table S5.** EXAFS fitting results for  $[\text{Fe(IV)(O)(TMG2dien)(Cl)}]^+$  (**7-Cl**).

| Fit | Fe-N/O   |              |                           | Fe-O/N   |              |            | Fe-Cl    |              |            | Fe•••C   |              |            | Fe•••C/N |              |            | F     | F-factor |
|-----|----------|--------------|---------------------------|----------|--------------|------------|----------|--------------|------------|----------|--------------|------------|----------|--------------|------------|-------|----------|
|     | <i>N</i> | <i>r</i> (Å) | $\sigma^2$ <sup>(a)</sup> | <i>N</i> | <i>r</i> (Å) | $\sigma^2$ |       |          |
| 1   | 2        | 1.942        | 0.00                      | 1        | 1.672        | 5.44       | 1        | 2.242        | 7.76       |          |              |            |          |              |            | 382.0 | 0.690    |
| 2   | 3        | 1.942        | 2.85                      | 1        | 1.663        | 3.15       | 1        | 2.267        | 7.79       |          |              |            |          |              |            | 381.2 | 0.689    |
| 3   | 4        | 1.941        | 5.41                      | 1        | 1.657        | 1.97       | 1        | 2.283        | 8.06       |          |              |            |          |              |            | 390.0 | 0.697    |
| 4   | 3        | 1.945        | 3.05                      | 0.9      | 1.662        | 2.52       | 0.9      | 2.272        | 6.94       |          |              |            |          |              |            | 380.2 | 0.688    |
| 5   | 3        | 1.948        | 3.30                      | 0.8      | 1.661        | 1.85       | 0.8      | 2.279        | 6.03       |          |              |            |          |              |            | 379.4 | 0.687    |
| 6   | 3        | 1.952        | 3.19                      | 0.8      | 1.663        | 1.89       | 0.8      | 2.286        | 5.43       | 2        | 2.929        | 3.77       |          |              |            | 342.1 | 0.653    |
| 7   | 3        | 1.953        | 3.24                      | 0.8      | 1.664        | 1.94       | 0.8      | 2.289        | 5.33       | 3        | 2.938        | 5.51       |          |              |            | 333.5 | 0.644    |
| 8   | 3        | 1.940        | 3.36                      | 0.8      | 1.658        | 0.98       | 0.9      | 2.269        | 5.72       | 3        | 2.923        | 2.86       | 3        | 3.384        | -2.30      | 222.2 | 0.526    |
| 9   | 3        | 1.939        | 3.38                      | 0.9      | 1.657        | 1.00       | 0.8      | 2.267        | 5.93       | 3        | 2.918        | 3.22       | 4        | 3.382        | -0.90      | 220.6 | 0.524    |
| 10  | 3        | 1.939        | 3.38                      | 0.8      | 1.657        | 1.04       | 0.8      | 2.266        | 6.10       | 3        | 2.915        | 3.59       | 5        | 3.381        | 0.29       | 220.8 | 0.524    |
| 11  | 3        | 1.938        | 3.39                      | 0.8      | 1.657        | 1.08       | 0.8      | 2.265        | 6.27       | 3        | 2.912        | 3.91       | 6        | 3.380        | 1.34       | 222.4 | 0.526    |
| 12  | 3        | 1.937        | 3.39                      | 0.8      | 1.657        | 1.10       | 0.8      | 2.264        | 6.41       | 3        | 2.909        | 4.31       | 7        | 3.379        | 2.32       | 224.8 | 0.529    |
| 13  | 3        | 1.939        | 3.44                      | 0.8      | 1.657        | 1.10       | 0.8      | 2.267        | 6.24       | 3        | 2.914        | 3.89       | 6        | 3.379        | 1.37       | 222.2 | 0.526    |
| 14  | 3        | 1.944        | 3.49                      | 0.8      | 1.658        | 1.26       | 0.8      | 2.274        | 6.04       | 4        | 2.924        | 6.35       | 6        | 3.385        | 1.63       | 222.9 | 0.527    |
| 15  | 3        | 1.943        | 3.49                      | 0.8      | 1.658        | 1.30       | 0.8      | 2.273        | 6.15       | 4        | 2.923        | 6.88       | 7        | 3.383        | 2.65       | 225.7 | 0.530    |
| 16  | 2        | 1.961        | -0.60                     | 1        | 1.686        | 7.78       | 1        | 2.209        | 12.16      |          |              |            |          |              |            | 385.6 | 0.693    |
|     | 1        | 2.154        | 0.05                      |          |              |            |          |              |            |          |              |            |          |              |            |       |          |
| 17  | 2        | 1.957        | -0.60                     | 1        | 1.687        | 6.82       | 1        | 2.251        | 9.18       | 3        | 2.946        | 5.18       |          |              |            | 335.2 | 0.646    |
|     | 1        | 2.148        | 3.97                      |          |              |            |          |              |            |          |              |            |          |              |            |       |          |
| 18  | 2        | 1.937        | 0.26                      | 1        | 1.666        | 3.94       | 1        | 2.244        | 7.84       | 3        | 2.911        | 3.52       | 6        | 3.379        | 1.37       | 222.3 | 0.5261   |
|     | 1        | 1.966        | 27.78                     |          |              |            |          |              |            |          |              |            |          |              |            |       |          |
| 19  | 3        | 1.939        | 3.39                      | 0.8      | 1.657        | 1.11       | 0.8      | 2.266        | 6.21       | 3        | 2.913        | 3.96       | 6        | 3.380        | 1.38       | 222.2 | 0.526    |

<sup>a</sup>Fourier-transform range is 2 – 12 Å<sup>-1</sup> (resolution = 0.158 Å), and  $\sigma^2$  is in units of 10<sup>3</sup> Å<sup>2</sup>.

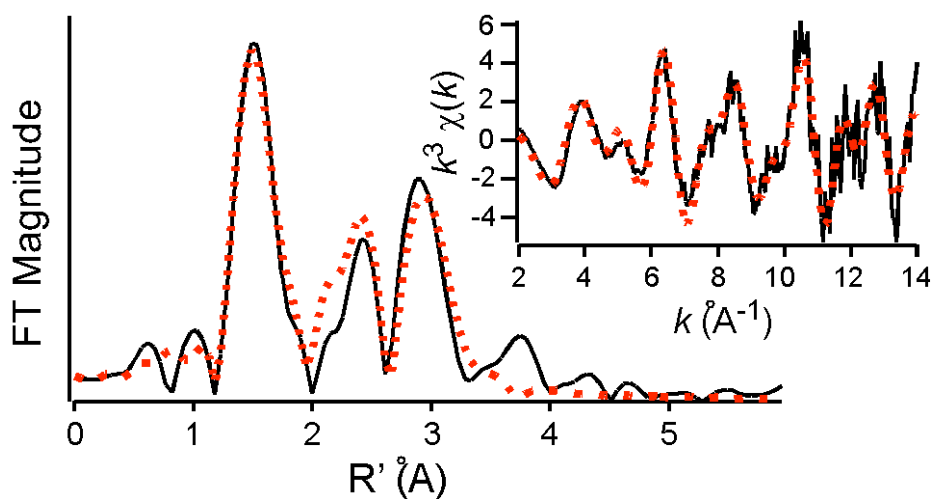

**Figure S11.** Fe K-edge unfiltered EXAFS data ( $k^3 \chi(k)$ , inset) and the corresponding Fourier transform for **7**. The red dots and solid black lines correspond to the experimental data and fits, respectively.

### DFT calculations.

DFT calculations were performed using Becke's three parameter hybrid (B3LYP) functional and basis set 6-311G provided by Gaussian'03 software package.<sup>13</sup> The quadrupole splitting  $\Delta E_Q$  was calculated using the property keyword of the Gaussian code and  $Q(^{57}\text{Fe}) = 0.17$  barn. The  $^{57}\text{Fe}$  isomer shift  $\delta$  was evaluated from the DFT charge density at the Fe nucleus using the calibration given by Vrajmasu et al.<sup>14</sup> The SCF procedure and geometry optimization were terminated upon reaching the default convergence criteria. The populations were calculated with the population keyword. The initial structural model for **7**, **7-N<sub>3</sub>** and **7-Cl** were constructed using the crystal structure of **2** and replacing the two triflate ligands by an oxygen atom at the axial position and an X ligand (X = NCCH<sub>3</sub> for **7**, N<sub>3</sub><sup>-</sup> for **7-N<sub>3</sub>**, and Cl<sup>-</sup> for **7-Cl**) at the equatorial position.

**Table S6.** Spectroscopic parameters of selected oxoiron(IV) complexes.

| Complex                      | D<br>[cm <sup>-1</sup> ] | E/D               | A <sub>x,y,z</sub> /g <sub>n</sub> β <sub>n</sub> (T) <sup>e</sup> | ΔE <sub>Q</sub><br>[mm s <sup>-1</sup> ] | η    | δ<br>[mm s <sup>-1</sup> ] |
|------------------------------|--------------------------|-------------------|--------------------------------------------------------------------|------------------------------------------|------|----------------------------|
| <b>7 (exp)</b>               | 4.6 <sup>a</sup>         | 0.09 <sup>a</sup> | -13.9, -15.8, -26.0                                                | 0.58 <sup>c</sup>                        | 0.20 | 0.08                       |
|                              | 4.2 <sup>b</sup>         | 0.10 <sup>b</sup> |                                                                    |                                          |      |                            |
| <b>7 (DFT)</b>               | -                        | -                 | -12.7, -16.5, -26.5 <sup>c</sup>                                   | 1.17                                     | 0.55 | 0.13                       |
| <b>7-N<sub>3</sub> (exp)</b> | 4.6 <sup>a</sup>         | 0.04 <sup>a</sup> | -15.5, -14.5, -27.0                                                | -0.30 <sup>d</sup>                       | 0.35 | 0.11                       |
|                              | 5.0 <sup>b</sup>         | 0.05 <sup>b</sup> |                                                                    |                                          |      |                            |
| <b>7-N<sub>3</sub> (DFT)</b> | -                        | -                 | -15.9, -14.7, -26.5 <sup>c</sup>                                   | -0.26                                    | 0.28 | 0.12                       |
| <b>7-Cl (exp)</b>            | 4.1 <sup>a</sup>         | 0.13 <sup>a</sup> | -15.1, -15.4, -26.6                                                | 0.41                                     | 0.53 | 0.08                       |
|                              | 4.2 <sup>b</sup>         | 0.14 <sup>b</sup> |                                                                    |                                          |      |                            |
| <b>7-Cl (DFT)</b>            | -                        | -                 | -13.9, 16.3 -26.9                                                  | 0.74                                     | 0.23 | 0.11                       |

<sup>a</sup> Determined by Mössbauer; <sup>b</sup> Determined by EPR; <sup>c</sup> The electric field gradient (EFG) tensor and the A-tensor are rotated relative to the ZFS tensor by  $\alpha_{\text{EFG}} = 50^\circ$ ,  $\beta_{\text{EFG}} = 45^\circ$  and by  $\alpha_A = 55^\circ$  (WMOSS convention); see the Mössbauer comments above; <sup>d</sup> the EFG tensor and the A-tensor are rotated by  $\alpha_{\text{EFG}} = 30^\circ$ ,  $\beta_{\text{EFG}} = 60^\circ$  and by  $\alpha_A = 20^\circ$ ; <sup>e</sup> Calculated A-tensors were obtained by taking the experimentally determined A<sub>iso</sub> and adding the spin-dipolar term obtained from DFT.

**Table S7.** Electronic energies of the lowest excited spin states ( $S = 1$  and  $S = 0$ ) for **7**, **7-N<sub>3</sub>** and **7-Cl** calculated by DFT.<sup>a,b</sup>

|                        | $S = 2$ | $S = 1$ | $S = 0$ |
|------------------------|---------|---------|---------|
| <b>7</b>               | 0       | 6       | 13      |
| <b>7-N<sub>3</sub></b> | 0       | 7       | 12      |
| <b>7-Cl</b>            | 0       | 7       | 10      |

<sup>a</sup> The ground state energy is set to zero. <sup>b</sup> Unit:  $10^3 \text{ cm}^{-1}$ .

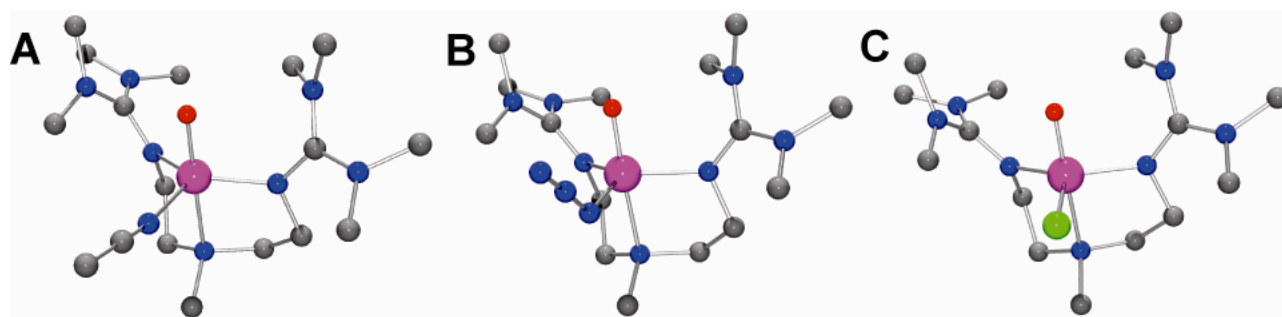

**Figure S12.** Ball-and-stick models of the DFT geometry optimized structures of (A) **7**, (B) **7-N<sub>3</sub>** and (C) **7-Cl**. Hydrogen atoms have been omitted for clarity. Atom color scheme: C, gray; Cl, green; Fe, magenta; N, blue; O, red.

**Table S8.** Selected bond lengths and angles of **7**, **7-N<sub>3</sub>** and **7-Cl** calculated by DFT.

| Selected bond lengths (Å) and angles (°)   | <b>7</b><br>(X = CH <sub>3</sub> CN) | <b>7-N<sub>3</sub></b><br>(X = N <sub>3</sub> <sup>-</sup> ) | <b>7-Cl</b><br>(X = Cl <sup>-</sup> ) |
|--------------------------------------------|--------------------------------------|--------------------------------------------------------------|---------------------------------------|
| Fe-X                                       | 2.1433                               | 1.9224                                                       | 2.3498                                |
| Fe-O                                       | 1.6485                               | 1.6489                                                       | 1.6444                                |
| Fe-N <sub>eq</sub> (1)                     | 1.9618                               | 2.0346                                                       | 1.9934                                |
| Fe-N <sub>eq</sub> (2)                     | 1.9654                               | 2.0287                                                       | 1.9908                                |
| Fe-N <sub>ax</sub>                         | 2.1497                               | 2.2089                                                       | 2.2124                                |
| O-Fe-N <sub>ax</sub>                       | 177.72                               | 174.23                                                       | 171.84                                |
| O-Fe-X                                     | 90.61                                | 96.54                                                        | 95.88                                 |
| O-Fe-N <sub>eq</sub> (1)                   | 95.81                                | 95.96                                                        | 95.51                                 |
| O-Fe-N <sub>eq</sub> (2)                   | 95.11                                | 95.07                                                        | 93.05                                 |
| N <sub>ax</sub> -Fe-X                      | 91.66                                | 89.23                                                        | 92.28                                 |
| N <sub>ax</sub> -Fe-N <sub>eq</sub> (1)    | 83.72                                | 81.91                                                        | 82.77                                 |
| N <sub>ax</sub> -Fe-N <sub>eq</sub> (2)    | 83.55                                | 81.63                                                        | 81.73                                 |
| X-Fe-N <sub>eq</sub> (1)                   | 108.59                               | 110.67                                                       | 104.24                                |
| X-Fe-N <sub>eq</sub> (2)                   | 119.58                               | 124.42                                                       | 127.06                                |
| N <sub>eq</sub> (1)-Fe-N <sub>eq</sub> (2) | 130.331                              | 121.82                                                       | 126.65                                |

**Table S9.** Iron 3d orbital population and spin population of **7**, **7-N<sub>3</sub>**, **7-Cl** and **2**.

|                        |                 | d <sub>xz</sub> | d <sub>yz</sub> | d <sub>x<sup>2</sup>-y<sup>2</sup></sub> | d <sub>xy</sub> | d <sub>z<sup>2</sup></sub> | Total | Fe Charge |
|------------------------|-----------------|-----------------|-----------------|------------------------------------------|-----------------|----------------------------|-------|-----------|
| <b>7</b>               | Population      | 1.39            | 1.41            | 1.15                                     | 1.16            | 0.94                       | 6.05  | 1.57      |
|                        | Spin Population | 0.60            | 0.59            | 0.82                                     | 0.81            | 0.21                       | 3.03  |           |
| <b>7-N<sub>3</sub></b> | Population      | 1.33            | 1.37            | 1.19                                     | 1.19            | 0.96                       | 6.04  | 1.56      |
|                        | Spin Population | 0.66            | 0.62            | 0.79                                     | 0.79            | 0.21                       | 3.07  |           |
| <b>7-Cl</b>            | Population      | 1.37            | 1.39            | 1.19                                     | 1.15            | 0.96                       | 6.06  | 1.46      |
|                        | Spin Population | 0.63            | 0.60            | 0.79                                     | 0.83            | 0.20                       | 3.05  |           |
| <b>2<sup>a</sup></b>   | Population      | 1.38            | 1.37            | 1.16                                     | 1.16            | 0.93                       | 6.00  | 1.64      |
|                        | Spin Population | 0.61            | 0.61            | 0.82                                     | 0.82            | 0.18                       | 3.04  |           |

<sup>a</sup> Values reported in reference 15.**Table S10.** Oxo 2p orbital population and spin population of **7**, **7-N<sub>3</sub>**, **7-Cl** and **2**.

|                        |                 | p <sub>xs</sub> | p <sub>y</sub> | p <sub>z</sub> | Total | O Charge |
|------------------------|-----------------|-----------------|----------------|----------------|-------|----------|
| <b>7</b>               | Population      | 1.56            | 1.55           | 1.38           | 4.49  | -0.45    |
|                        | Spin Population | 0.39            | 0.40           | -0.09          | 0.7   |          |
| <b>7-N<sub>3</sub></b> | Population      | 1.62            | 1.59           | 1.35           | 4.56  | -0.51    |
|                        | Spin Population | 0.32            | 0.36           | -0.13          | 0.55  |          |
| <b>7-Cl</b>            | Population      | 1.61            | 1.56           | 1.34           | 4.51  | -0.46    |
|                        | Spin Population | 0.34            | 0.39           | -0.12          | 0.61  |          |
| <b>2</b>               | Population      | 1.58            | 1.58           | 1.37           | 4.53  | -0.48    |
|                        | Spin Population | 0.37            | 0.37           | -0.11          | 0.63  |          |



**Table S11.** Cartesian coordinates (Å) for the DFT energy minimized model of 7.

|    |    | x        | y        | z        |
|----|----|----------|----------|----------|
| 1  | Fe | 0.046962 | 0.509248 | 0.035891 |
| 2  | N  | 1.711588 | -0.32653 | 0.651473 |
| 3  | N  | 0.176925 | 1.584175 | 1.892972 |
| 4  | N  | -1.8119  | 0.206214 | 0.597533 |
| 5  | N  | 3.835753 | -1.04914 | -0.13787 |
| 6  | N  | 1.934993 | -2.33374 | -0.57813 |
| 7  | N  | -3.65105 | -1.30093 | 0.45975  |
| 8  | N  | -3.04039 | -0.03407 | -1.4043  |
| 9  | C  | 2.235262 | 0.222735 | 1.936745 |
| 10 | C  | 1.031462 | 0.675909 | 2.748988 |
| 11 | C  | -1.23346 | 1.69732  | 2.423105 |
| 12 | C  | -2.02488 | 0.455603 | 2.052883 |
| 13 | C  | 2.488205 | -1.22872 | -0.02989 |
| 14 | C  | 4.444747 | 0.28993  | -0.22665 |
| 15 | C  | 4.79574  | -2.17462 | -0.16116 |
| 16 | C  | 2.40721  | -2.91297 | -1.85343 |
| 17 | C  | 0.722231 | -2.9637  | -0.0323  |
| 18 | C  | 0.792593 | 2.953844 | 1.840475 |
| 19 | C  | -2.81868 | -0.38191 | -0.11499 |
| 20 | C  | -3.18145 | -2.28279 | 1.454203 |
| 21 | C  | -5.09284 | -1.38159 | 0.136072 |
| 22 | C  | -3.52567 | -0.99929 | -2.41245 |
| 23 | C  | -2.68664 | 1.286592 | -1.94526 |
| 24 | O  | -0.07531 | -0.36697 | -1.35514 |
| 25 | H  | 2.924699 | 1.055069 | 1.783148 |
| 26 | H  | 2.782539 | -0.54698 | 2.483847 |
| 27 | H  | 0.433376 | -0.18832 | 3.031323 |
| 28 | H  | 1.331149 | 1.197833 | 3.66076  |
| 29 | H  | -1.68145 | 2.571411 | 1.954411 |
| 30 | H  | -1.21723 | 1.859974 | 3.503948 |
| 31 | H  | -1.70892 | -0.39589 | 2.659283 |
| 32 | H  | -3.08309 | 0.617675 | 2.262888 |
| 33 | H  | 3.681245 | 1.030656 | -0.44431 |
| 34 | H  | 5.170918 | 0.29181  | -1.03943 |
| 35 | H  | 4.964548 | 0.556851 | 0.695208 |
| 36 | H  | 4.30683  | -3.08841 | 0.160642 |
| 37 | H  | 5.605702 | -1.95143 | 0.532803 |
| 38 | H  | 5.222417 | -2.32345 | -1.15336 |
| 39 | H  | 3.124017 | -2.2498  | -2.32567 |
| 40 | H  | 1.549225 | -3.01854 | -2.51642 |

|    |   |          |          |          |
|----|---|----------|----------|----------|
| 41 | H | 2.860649 | -3.89308 | -1.70584 |
| 42 | H | 0.537282 | -2.59301 | 0.970669 |
| 43 | H | 0.879623 | -4.0416  | 0.011192 |
| 44 | H | -0.13608 | -2.74891 | -0.66611 |
| 45 | H | 0.829146 | 3.383368 | 2.843793 |
| 46 | H | 0.195887 | 3.596079 | 1.201436 |
| 47 | H | 1.800403 | 2.901797 | 1.440815 |
| 48 | H | -2.0968  | -2.32992 | 1.450337 |
| 49 | H | -3.56791 | -3.26573 | 1.184705 |
| 50 | H | -3.53351 | -2.04262 | 2.458766 |
| 51 | H | -5.40514 | -0.49323 | -0.40368 |
| 52 | H | -5.65384 | -1.435   | 1.068911 |
| 53 | H | -5.32694 | -2.26559 | -0.45789 |
| 54 | H | -3.51323 | -2.00508 | -2.00683 |
| 55 | H | -2.85445 | -0.96435 | -3.27    |
| 56 | H | -4.53433 | -0.75599 | -2.7467  |
| 57 | H | -2.50384 | 1.980998 | -1.13207 |
| 58 | H | -3.52077 | 1.653653 | -2.54353 |
| 59 | H | -1.80046 | 1.216883 | -2.57407 |
| 60 | N | 0.539576 | 2.266742 | -1.08762 |
| 61 | C | 0.807149 | 3.067311 | -1.88582 |
| 62 | C | 1.136554 | 4.062224 | -2.88964 |
| 63 | H | 0.262453 | 4.670782 | -3.12666 |
| 64 | H | 1.926841 | 4.724554 | -2.53386 |
| 65 | H | 1.476751 | 3.578561 | -3.80643 |

**Table S12.** Cartesian coordinates (Å) for the DFT energy minimized model of 7-N<sub>3</sub>.

|    |    | x         | y         | z         |
|----|----|-----------|-----------|-----------|
| 1  | Fe | -0.071466 | 0.599145  | 0.277546  |
| 2  | N  | -1.745939 | 0.026538  | -0.726411 |
| 3  | N  | -0.156881 | 2.270895  | -1.163787 |
| 4  | N  | 1.780274  | 0.392188  | -0.524907 |
| 5  | N  | -3.872357 | -0.886238 | -0.170706 |
| 6  | N  | -1.991911 | -2.271128 | -0.299066 |
| 7  | N  | 3.612935  | -1.071849 | -0.931181 |
| 8  | N  | 3.021666  | -0.513236 | 1.259978  |
| 9  | C  | -2.305590 | 1.117168  | -1.562313 |
| 10 | C  | -1.122697 | 1.810186  | -2.224535 |
| 11 | C  | 1.236499  | 2.436102  | -1.705289 |
| 12 | C  | 1.924915  | 1.083976  | -1.828000 |
| 13 | C  | -2.524574 | -1.023333 | -0.397207 |
| 14 | C  | -4.422493 | 0.304624  | 0.497080  |

|    |   |           |           |           |
|----|---|-----------|-----------|-----------|
| 15 | C | -4.853476 | -1.919398 | -0.542726 |
| 16 | C | -2.405327 | -3.220769 | 0.749486  |
| 17 | C | -0.773535 | -2.648513 | -1.024408 |
| 18 | C | -0.617821 | 3.572414  | -0.579155 |
| 19 | C | 2.778413  | -0.389091 | -0.071936 |
| 20 | C | 3.122754  | -1.679190 | -2.176507 |
| 21 | C | 5.051930  | -1.242717 | -0.666215 |
| 22 | C | 3.448644  | -1.788089 | 1.862985  |
| 23 | C | 2.676708  | 0.532673  | 2.234417  |
| 24 | O | 0.029012  | -0.746934 | 1.224703  |
| 25 | H | -2.879442 | 1.840425  | -0.979097 |
| 26 | H | -2.976751 | 0.714558  | -2.324937 |
| 27 | H | -0.610760 | 1.101477  | -2.872729 |
| 28 | H | -1.442761 | 2.662293  | -2.831448 |
| 29 | H | 1.782481  | 3.054539  | -0.995354 |
| 30 | H | 1.211157  | 2.960583  | -2.666184 |
| 31 | H | 1.482784  | 0.505370  | -2.643926 |
| 32 | H | 2.977585  | 1.232408  | -2.078343 |
| 33 | H | -3.620632 | 0.873336  | 0.958935  |
| 34 | H | -5.109411 | -0.015985 | 1.281508  |
| 35 | H | -4.971127 | 0.944979  | -0.197392 |
| 36 | H | -4.384514 | -2.663136 | -1.179855 |
| 37 | H | -5.669199 | -1.450999 | -1.095631 |
| 38 | H | -5.274670 | -2.416164 | 0.333791  |
| 39 | H | -3.141116 | -2.762931 | 1.401973  |
| 40 | H | -1.532346 | -3.476377 | 1.350713  |
| 41 | H | -2.821398 | -4.132805 | 0.318534  |
| 42 | H | -0.622946 | -1.964898 | -1.854143 |
| 43 | H | -0.893924 | -3.662537 | -1.408900 |
| 44 | H | 0.091179  | -2.607086 | -0.363445 |
| 45 | H | -0.576575 | 4.356515  | -1.340790 |
| 46 | H | 0.010670  | 3.829835  | 0.265341  |
| 47 | H | -1.631130 | 3.476679  | -0.205654 |
| 48 | H | 2.037494  | -1.714306 | -2.170023 |
| 49 | H | 3.498032  | -2.701719 | -2.245952 |
| 50 | H | 3.459292  | -1.132812 | -3.060756 |
| 51 | H | 5.354667  | -0.605109 | 0.158627  |
| 52 | H | 5.614659  | -0.951677 | -1.554771 |
| 53 | H | 5.302755  | -2.278004 | -0.425078 |
| 54 | H | 3.464002  | -2.573235 | 1.114246  |
| 55 | H | 2.731378  | -2.061989 | 2.637121  |
| 56 | H | 4.437867  | -1.702782 | 2.315880  |
| 57 | H | 2.460516  | 1.462178  | 1.720235  |

|    |   |           |          |          |
|----|---|-----------|----------|----------|
| 58 | H | 3.527235  | 0.682263 | 2.901471 |
| 59 | H | 1.810143  | 0.239244 | 2.823842 |
| 60 | N | -0.513073 | 1.827486 | 1.688802 |
| 61 | N | -0.634451 | 1.598454 | 2.896593 |
| 62 | N | -0.751018 | 1.435363 | 4.042729 |

**Table S13.** Cartesian coordinates (Å) for the DFT energy minimized model of 7-Cl.

|    |    | x         | y         | z         |
|----|----|-----------|-----------|-----------|
| 1  | Fe | -0.058514 | 0.498375  | 0.369286  |
| 2  | N  | -1.755387 | 0.105180  | -0.600195 |
| 3  | N  | -0.139793 | 2.363600  | -0.817711 |
| 4  | N  | 1.782781  | 0.438169  | -0.385366 |
| 5  | N  | -3.861818 | -0.809888 | 0.017994  |
| 6  | N  | -2.065447 | -2.221620 | -0.484329 |
| 7  | N  | 3.626641  | -0.977805 | -0.890108 |
| 8  | N  | 3.022693  | -0.578296 | 1.334048  |
| 9  | C  | -2.324446 | 1.304113  | -1.265066 |
| 10 | H  | -2.849197 | 1.959854  | -0.567250 |
| 11 | H  | -3.040584 | 1.011238  | -2.036155 |
| 12 | C  | -1.151945 | 2.044334  | -1.892321 |
| 13 | H  | -0.678441 | 1.404405  | -2.635065 |
| 14 | H  | -1.471644 | 2.966667  | -2.385099 |
| 15 | C  | 1.239290  | 2.566435  | -1.389890 |
| 16 | H  | 1.810715  | 3.126371  | -0.652303 |
| 17 | H  | 1.183789  | 3.164475  | -2.304792 |
| 18 | C  | 1.915361  | 1.226324  | -1.633430 |
| 19 | H  | 1.455858  | 0.713041  | -2.483042 |
| 20 | H  | 2.965548  | 1.385189  | -1.885859 |
| 21 | C  | -2.553085 | -0.960938 | -0.351283 |
| 22 | C  | -4.297112 | 0.304138  | 0.881446  |
| 23 | H  | -3.436953 | 0.777474  | 1.346340  |
| 24 | H  | -4.931019 | -0.096307 | 1.673205  |
| 25 | H  | -4.873157 | 1.044514  | 0.322261  |
| 26 | C  | -4.918628 | -1.753889 | -0.385725 |
| 27 | H  | -4.553917 | -2.406242 | -1.173524 |
| 28 | H  | -5.767855 | -1.186138 | -0.767860 |
| 29 | H  | -5.263043 | -2.363211 | 0.451966  |
| 30 | C  | -2.434616 | -3.308425 | 0.440904  |
| 31 | H  | -3.060491 | -2.923205 | 1.238598  |
| 32 | H  | -1.523271 | -3.705227 | 0.888140  |
| 33 | H  | -2.957835 | -4.114102 | -0.076376 |
| 34 | C  | -0.934157 | -2.521996 | -1.370558 |

|    |    |           |           |           |
|----|----|-----------|-----------|-----------|
| 35 | H  | -0.830711 | -1.729627 | -2.105277 |
| 36 | H  | -1.129625 | -3.465047 | -1.882818 |
| 37 | H  | -0.012336 | -2.601922 | -0.795604 |
| 38 | C  | -0.550270 | 3.619556  | -0.101275 |
| 39 | H  | -0.503300 | 4.464924  | -0.793886 |
| 40 | H  | 0.108307  | 3.791514  | 0.742278  |
| 41 | H  | -1.556401 | 3.521332  | 0.288687  |
| 42 | C  | 2.788983  | -0.367359 | 0.015211  |
| 43 | C  | 3.137706  | -1.501722 | -2.174145 |
| 44 | H  | 2.052920  | -1.552295 | -2.165383 |
| 45 | H  | 3.525643  | -2.511626 | -2.316311 |
| 46 | H  | 3.463507  | -0.889638 | -3.018325 |
| 47 | C  | 5.067472  | -1.156191 | -0.638423 |
| 48 | H  | 5.366171  | -0.576117 | 0.229218  |
| 49 | H  | 5.626419  | -0.798459 | -1.504594 |
| 50 | H  | 5.326023  | -2.203854 | -0.471698 |
| 51 | C  | 3.474444  | -1.882465 | 1.851932  |
| 52 | H  | 3.483912  | -2.621776 | 1.057766  |
| 53 | H  | 2.772063  | -2.209182 | 2.618550  |
| 54 | H  | 4.469511  | -1.812633 | 2.294002  |
| 55 | C  | 2.637972  | 0.391159  | 2.374787  |
| 56 | H  | 2.472122  | 1.366090  | 1.929921  |
| 57 | H  | 3.451961  | 0.463889  | 3.096878  |
| 58 | H  | 1.728958  | 0.082452  | 2.886569  |
| 59 | O  | 0.079596  | -0.989563 | 1.055587  |
| 60 | Cl | -0.752268 | 1.601653  | 2.324553  |

### Substrate Oxidation Kinetics.

Solutions of **7** were prepared by adding 1 equivalent of 2-(<sup>t</sup>BuSO<sub>2</sub>)C<sub>6</sub>H<sub>4</sub>IO dissolved in a small amount of dichloromethane to 2 mL of 0.2-0.1 mM CH<sub>3</sub>CN solutions of **5** prepared under an inert atmosphere. Kinetic measurements of substrate oxidations were performed at -30° C and monitored by the formation and decay of appropriate bands in their UV-Vis absorbance spectra (Figures S13 and S14). Fitting to the resultant decay and growth curves obtained from the spectra yielded pseudo-first order rate constants,  $k_{\text{obs}}$ , that were found in all cases to be strictly first order in substrate (Figure S15). The measurements of  $k_{\text{obs}}$  values for the substrate oxidations were repeated on subsequent days with different concentrations of **7** to ensure reproducibility.

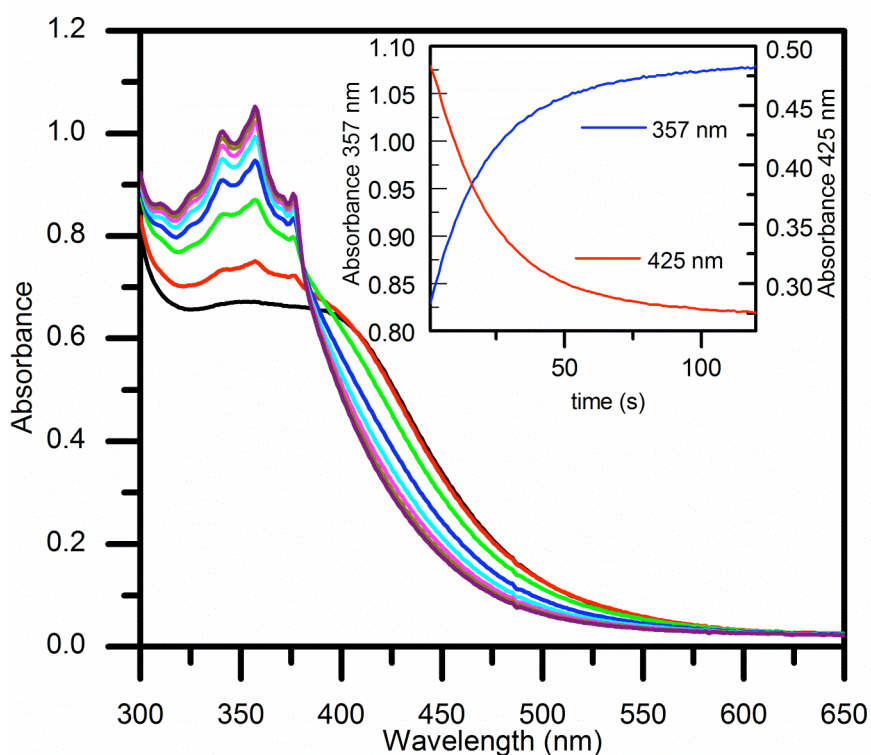

**Figure S13.** Typical UV-Vis changes seen upon reaction of **7** with 9,10-dihydroanthracene. The reaction was monitored by the decay of the shoulder attributed to **7** at 425 nm and the formation of the anthracene product band at 357 nm. In all cases, the pseudo-first order rate constants obtained from monitoring the the 357 and 425 nm absorbances were nearly identical.

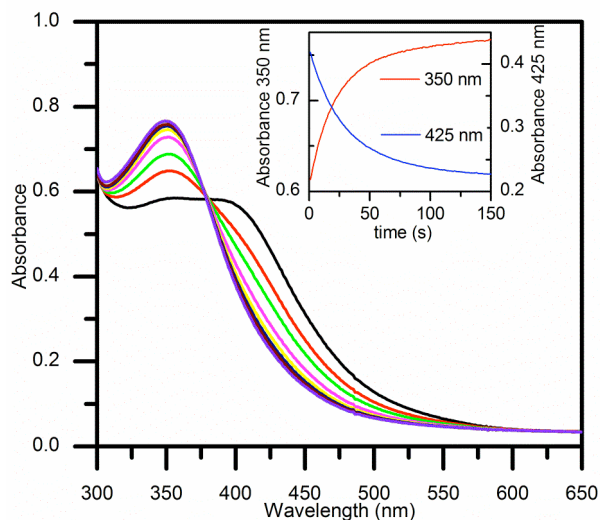

**Figure S14.** Typical UV-Vis changes seen upon reaction of **7** with 1,4-cyclohexadiene. The reaction was monitored by the decay of the shoulder attributed to **7** at 425 nm and the formation of the decay product band at 350 nm. In all cases, the pseudo-first order rate constants obtained from monitoring the 350 and 425 nm absorbances were nearly identical.

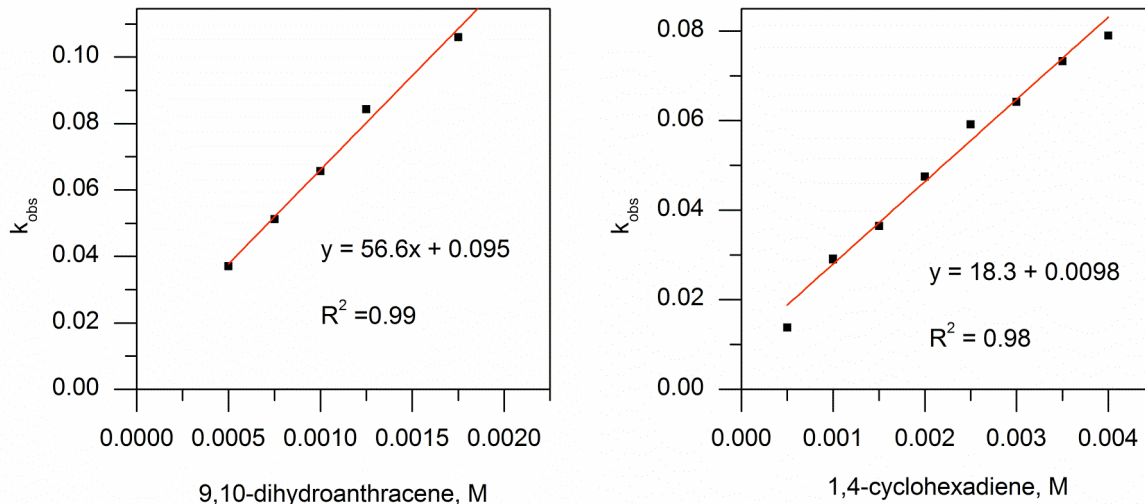

**Figure S15.** Plots of  $k_{obs}$  vs. substrate concentration obtained from reaction of **7** with 9,10-dihydroanthracene (DHA, left) and 1,4-cyclohexadiene (CHD, right). Linear fits yielded second order rate constants,  $k_2$ , of 57 and 18  $M^{-1}s^{-1}$ , respectively.

## References.

- (1) Macikenas, D.; Skrzypczak-Jankun, E.; Protasiewicz, J. D. *J. Am. Chem. Soc.* **1999**, *121*, 7164-7165.
- (2) Hagadorn, J. R.; Que, L.; Tolman, W. B. *Inorg. Chem.* **2000**, *39*, 6086-6090.
- (3) Wittmann, H.; Raab, V.; Schorm, A.; Plackmeyer, J.; Sundermeyer, J. *Eur. J. Inorg. Chem.* **2001**, 1937-1948.
- (4) Herres-Pawlis, S.; Neuba, A.; Seewald, O.; Seshadri, T.; Egold, H.; Flörke, U.; Henkel, G. *Eur. J. Org. Chem.* **2005**, *2005*, 4879-4890.
- (5) Blessing, R. H. *Acta Crystallogr., Sect. A: Found. Crystallogr.* **1995**, *A51*, 33-8.
- (6) *SAINTE V 6.45*; Bruker Analytical X-Ray Systems: Madison, WI 2003.
- (7) *SHELXTL V 6.14*; Bruker Analytical X-Ray Systems: Madison, WI 2000.
- (8) George, G. N.; Stanford Synchrotron Radiation Laboratory, Stanford Linear Accelerator Center: Stanford, CA, 2000.
- (9) Klinker, E. J.; Jackson, T. A.; Jensen, M. P.; Stubna, A.; Juhasz, G.; Bominaar, E. L.; Münck, E.; Que, L. *Angew. Chem. Int. Ed.* **2006**, *45*, 7394-7397.
- (10) Ankudinov, A. L.; Ravel, B.; Rehr, J. J.; Conradson, S. D. *Phys. Rev. B* **1998**, *58*, 7565-7576.
- (11) Scarrow, R. C.; Trimitsis, M. G.; Buck, C. P.; Grove, G. N.; Cowling, R. A.; Nelson, M. J. *Biochemistry* **1994**, *33*, 15023-15035.
- (12) Rohde, J.-U.; Torelli, S.; Shan, X.; Lim, M. H.; Klinker, E. J.; Kaizer, J.; Chen, K.; Nam, W.; Que, L. *J. Am. Chem. Soc.* **2004**, *126*, 16750-16761.
- (13) Gaussian 03, Revision E.01, M. J. Frisch, G. W. Trucks, H. B. Schlegel, G. E. Scuseria, M. A. Robb, J. R. Cheeseman, J. A. Montgomery, Jr., T. Vreven, K. N. Kudin, J. C. Burant, J. M. Millam, S. S. Iyengar, J. Tomasi, V. Barone, B. Mennucci, M. Cossi, G. Scalmani, N. Rega, G. A. Petersson, H. Nakatsuji, M. Hada, M. Ehara, K. Toyota, R. Fukuda, J. Hasegawa, M. Ishida, T. Nakajima, Y. Honda, O. Kitao, H. Nakai, M. Klene, X. Li, J. E. Knox, H. P. Hratchian, J. B. Cross, V. Bakken, C. Adamo, J. Jaramillo, R. Gomperts, R. E. Stratmann, O. Yazyev, A. J. Austin, R. Cammi, C. Pomelli, J. W. Ochterski, P. Y. Ayala, K. Morokuma, G. A. Voth, P. Salvador, J. J. Dannenberg, V. G. Zakrzewski, S. Dapprich, A. D. Daniels, M. C. Strain, O. Farkas, D. K. Malick, A. D. Rabuck, K. Raghavachari, J. B. Foresman, J. V. Ortiz, Q. Cui, A. G. Baboul, S. Clifford, J. Cioslowski, B. B. Stefanov, G. Liu, A. Liashenko, P. Piskorz, I. Komaromi, R. L. Martin, D. J. Fox, T. Keith, M. A. Al-Laham, C. Y. Peng, A. Nanayakkara, M. Challacombe, P. M. W. Gill, B. Johnson, W. Chen, M. W. Wong, C. Gonzalez, and J. A. Pople, Gaussian, Inc., Wallingford CT, **2004**.
- (14) Vrajmasu, V.; Münck, E.; Bominaar, E. L. *Inorg. Chem.* **2003**, *42*, 5974-5988.
- (15) England, J.; Martinho, M.; Farquhar, E. R.; Frisch, J. R.; Bominaar, E. L.; Münck, E.; Que, L., Jr. *Angew. Chem., Int. Ed.* **2009**, *48*, 3622-3626.
